1    **INCREASED ADHESION OF CML CELLS BY ABL1 TYROSINE KINASE**  
2                    **INHIBITORS INDUCE TUNNELING NANOTUBES**

3  
4  
5    Maria Omsland<sup>1</sup>, Vibeke Andresen<sup>1</sup>, Maria del Pilar Ayuda Duran<sup>2</sup>, Stein-Erik Gullaksen<sup>1</sup>, Randi  
6    Hovland<sup>3</sup>, Jorrit Enserink<sup>2</sup> and Bjørn Tore Gjertsen<sup>1,4\*</sup>

7    <sup>1</sup>Centre for Cancer Biomarkers (CCBIO), Department of Clinical Science, University of Bergen,  
8    Bergen, Norway, <sup>2</sup>Department of Molecular Cell Biology, Institute for Cancer Research, The  
9    Norwegian Radium Hospital, Oslo University Hospital, Montebello, Oslo, Norway, <sup>3</sup>Department  
10   of Medical Genetics, Haukeland University Hospital, Bergen, Norway <sup>4</sup>Department of Internal  
11   Medicine, Haukeland University Hospital, Bergen, Norway.

12  
13   \*Corresponding author: Centre for Cancer Biomarkers, Department of Clinical Science,  
14   University of Bergen, N-5021 Bergen, Norway Email: bjorn.gjertsen@uib.no, tel: +47-55975000,  
15   fax: +47-55972950.

16   **Running title:** TKIs induce TNTs in CML cells

17   Keywords: (5) Chronic myeloid leukemia (CML), Tunneling nanotubes (TNTs), Tyrosine kinase  
18   inhibitors (TKIs), Interleukins, Cell adhesion.

19

20

21

## Abstract

22 The actin-containing cell-to-cell communicator tunneling nanotube (TNT) is suggested to be  
23 involved in regulation of cell death threshold of leukemic cells, while the mechanism of TNT  
24 regulation is mostly unknown. We have investigated TNT formation and its response to treatment  
25 with the tyrosine kinase inhibitors (imatinib and nilotinib) in chronic myeloid leukemia (CML)  
26 cells with the pathognomonic chimeric fusion kinase BCR-ABL1. Bone marrow cells of chronic  
27 phase CML patients and CML cell lines (Kcl-22 and K562) formed few or no TNTs. Imatinib  
28 treatment induced TNT formation in both cell lines and the induction of TNTs was found to be  
29 related to increased adherence to fibronectin coated surfaces by restoration of  $\beta$ 1-integrin  
30 function. Co-culturing of Kcl-22 cells with stromal cells or conditioned medium inhibited the  
31 TKI-induced TNT formation. Interleukin-8 (CXCL8) secreted by the stromal cells was  
32 responsible for the TNT-inhibitory effect. This suggests modulation of TNT cell-cell  
33 communication in CML tumor-host interactions as a novel mechanism in kinase inhibitor therapy  
34 of CML.

35

36

37

## Introduction

38 Chronic myeloid leukemia (CML) is a myeloid stem cell disease characterized by the BCR-  
39 ABL1 fusion protein derived from the chromosomal translocation t(9;22), involving bone  
40 marrow and spleen in the chronic phase. The role of BCR-ABL1 in impaired communication  
41 between cells in the microenvironment (Bhatia, McGlave et al., 1995, Gordon, Dowding et al.,  
42 1987) is less understood in the context of the efficient therapies with small molecule kinase  
43 inhibitors that emerged at the millennium (Hochhaus, Larson et al., 2017).

44 The BCR-ABL1 protein has a filamentous (F)-actin binding domain and orchestrates several  
45 cellular processes involving actin processing, cell attachment to fibronectin and cell migration  
46 (Wertheim, Perera et al., 2003). Features of CML progenitor cells from patients in the chronic  
47 phase include increased motility and low affinity to fibronectin coated surfaces compared to  
48 normal counterparts (Verfaillie, McCarthy et al., 1992). Interferon alpha (IFN $\alpha$ ), previously  
49 pivotal in CML therapy, increase adhesion of CML progenitor cells to bone marrow stromal cells  
50 (Dowding, Guo et al., 1991). Attenuated cellular mobility seems therefore to be a significant  
51 mechanism of action in effective CML therapy, recently revisited in the effective therapeutic  
52 combination of a tyrosine kinase inhibitor (TKI) and IFN $\alpha$  eradicating CML progenitor cells  
53 resulting in non-detectable disease (Hjorth-Hansen, Stentoft et al., 2016, Simonsson, Gedde-Dahl  
54 et al., 2011).

55 It is well established that the tumor microenvironment plays a pivotal role in the outcome of  
56 cancer therapy (Joyce & Pollard, 2009). While the effect of hormones and growth factors on  
57 tumor survival is relatively well characterized, the effect of physical interactions is much less  
58 understood. One such form of physical interaction is the tunneling nanotube (TNT) (Rustom,  
59 Saffrich et al., 2004). TNTs are defined as thin (50-200 nm), fragile and dynamic structures,

60 consisting of plasma membrane and F-actin. They are involved in cell-cell interaction and  
61 intercellular transport of organelles and viral particles (Gurke, Barroso et al., 2008, Rustom et al.,  
62 2004, Sowinski, Jolly et al., 2008). Leukocytes, their leukemic counterparts and bone marrow  
63 stromal cells have all been reported to form TNTs *in vitro* (Andresen, Wang et al., 2013,  
64 Chauveau, Aucher et al., 2010, Matula, Nemeth et al., 2016, Omsland, Bruserud et al., 2017,  
65 Onfelt, Nedvetzki et al., 2004, Polak, de Rooij et al., 2015, Reichert, Scheinflug et al., 2016).  
66 TNTs facilitate transport of mitochondria between healthy cells and suggested to have an anti-  
67 apoptotic function (Ahmad, Mukherjee et al., 2014, Wang & Gerdes, 2015). TNTs might  
68 represent a mechanism for chemo resistance in e.g. by transport of oncoproteins as shown  
69 between T and B cells (Rainy, Chetrit et al., 2013) or by transfer of mitochondria from  
70 endothelial cells to chemotherapy exposed cancer cells (Pasquier, Guerrouahen et al., 2013). The  
71 impact of TNTs *in vivo* is so far not well characterized, but it has been described to connect  
72 myeloid cells in the cornea of mouse (Chinnery, Pearlman et al., 2008, Seyed-Razavi, Hickey et  
73 al., 2013) and in resected solid tumors from patients with malignant pleural mesothelioma and  
74 lung adenocarcinoma *in vivo* (Lou, Fujisawa et al., 2012).

75 Here, we characterized the function of BCR-ABL1 formation on TNTs in CML cells. We found  
76 low TNT numbers in CML cells, while treatment with the ABL1 inhibitor imatinib swiftly  
77 induced TNT formation. Mechanism of TNT formation involved increased fibronectin dependent  
78 adhesion through  $\beta$ 1-integrin and reduced CXCL8 signaling, proposing a role for a BCR-ABL1  
79 modulation of actin in TNT regulation that may provide a novel mechanism for effective CML  
80 therapy.

81

82

## Results

### 83 **TNT formation in Kcl-22 cells is significantly increased following treatment with IFN $\alpha$ or** 84 **TKIs**

85 In order to investigate the presence of TNTs between CML cells, primary bone marrow CML  
86 cells were cultured for 24 h on fibronectin coated surfaces and TNTs were quantified as earlier  
87 described for acute myeloid leukemia (AML) cells (Omsland et al., 2017). When we compared  
88 number of TNTs/100 cells in bone marrow cells derived from four different patients diagnosed  
89 with CML (P1-P4), very few TNTs were detected and the cells appeared mobile and  
90 morphologically spherical (Fig 1A and Supplemental Fig 1A).

91 Treatment of CML cells with IFN $\alpha$  or TKIs have been reported to increase cell adherence to  
92 fibronectin (Dowding et al., 1991, Obr, Roselova et al., 2014). Cell adherence has also been  
93 suggested to correlate with TNT formation (Reichert et al., 2016). Based on this, we examined  
94 the CML cell lines Kcl-22 and K562, before and after treatment for 24 h with pre-apoptotic doses  
95 of IFN $\alpha$  or the ABL1 specific TKIs imatinib or nilotinib (Druker, Tamura et al., 1996, Weisberg,  
96 Manley et al., 2005). To enable live imaging of TNTs the cell lines were stably transduced to  
97 express a cellular membrane localized GFP (memGFP). The untreated K562 cells showed highest  
98 TNT formation capabilities with 3.8 TNTs/100 cells compared to only 0.8 TNTs/100 cells for the  
99 untreated Kcl-22 cells (Fig 1B). The untreated K562 cells also seemed to adhere more strongly to  
100 the fibronectin-coated surfaces compared to Kcl-22 cells appearing morphologically spherical  
101 (Supplemental Fig S1B). Following IFN $\alpha$  treatment (100 U/ml) for 24 h, the Kcl-22 cells  
102 changed morphology, with increased adherence and cellular stretching in addition the number of  
103 TNTs increased from 0.8 TNTs/100 cells to 6.8 TNTs/100 cells. Interestingly, similar results

104 were not observed for the K562 cells (Fig 1B). Time-lapse microscopy after 1 h treatment with  
105 IFN $\alpha$  demonstrated GFP positive dots moving along the TNTs, from one cell to another,  
106 indicating that these TNTs could function as transport devices (Fig 1C and Supplementary video  
107 1). Next, we treated Kcl-22 and K562 cells for 24 h with pre-apoptotic concentrations of imatinib  
108 (5  $\mu$ M) or nilotinib (100 nM) and quantified the number of TNTs compared to untreated cells.  
109 Imatinib treatment induced TNT formation in both cell lines, while nilotinib treatment induced  
110 TNT formation in Kcl-22 cells only (Fig 1D). Cell viability after TKI treatment was verified by  
111 Hoechst staining, the K562 was the most sensitive cell line towards nilotinib treatment for 24 h  
112 (16.9 % for K562 and 10.2 % for Kcl-22) and we therefore investigated 1 hour treatment with  
113 nilotinib (100 nM) however, TNT induction was only observed in the Kcl-22 cells (Fig 1E).

114 Scanning electron microscopy revealed that the TNTs were thin cell-to-cell connecting structures  
115 which could contain bulges, indicating potential intercellular transport (Fig 1F, arrow).  
116 Immunofluorescence microscopy of nilotinib-treated Kcl-22 cells (1 h) revealed the presence of  
117 F-actin and the absence of  $\beta$ -tubulin in the TNTs (Fig 1G). The nilotinib-treated Kcl-22 cells also  
118 went through a change in morphology from spherical semi-attached cells to more spread-out and  
119 firmly attached cells (Fig 1G). The critical role of F-actin in these TNTs was further examined by  
120 treating the cells with the actin polymerization inhibitor cytochalasin D (CytD (Casella, Flanagan  
121 et al., 1981)). Kcl-22 cells were treated for 24 h with nilotinib (100 nM) and quantified for TNTs  
122 before treatment with CytD (2 $\mu$ M) for 20 min followed by a second TNT quantification (Fig 1H).  
123 This demonstrated that the CytD treatment resulted in TNT collapse and less prominent cell  
124 stretching (Fig 1H, I). These data demonstrate that inhibition of BCR-ABL1 by nilotinib induces  
125 the formation of TNTs in a manner dependent upon actin polymerization.

126 **Expression of BCR-ABL1 results in reduced TNT formation and cell adhesion**

127 To further study the role of BCR-ABL1 in TNT formation doxycycline inducible BCR-ABL1  
128 (Klucher et al, 1998) (p210) was introduced in Ba/F3 cells. Ba/F3 cells represent a well explored  
129 system for characterization of the oncogene function of BCR-ABL1, where expression of BCR-  
130 ABL1 allow Ba/F3 cells to grow IL-3 independent (Daley & Baltimore, 1988). The induction of  
131 BCR-ABL1 expression by doxycycline was verified by immunoblotting (Fig 2A) and also IL-3-  
132 independent growth (Supplementary Fig S2A). BCR-ABL1 induction resulted in more spherical  
133 morphology and less firmly fibronectin-attached cells on the coated plastic culture well (Fig 2B).  
134 Interestingly, expression of BCR-ABL1 was also accompanied by down-regulation of TNTs (Fig  
135 2C). Conversely, treatment of Kcl-22 cells with nilotinib (100 nM) for 1 h resulted in less  
136 spherical cell morphology, increased adherence and TNT formation (Fig 1E, I and 2D). We  
137 confirmed inhibition of BCR-ABL1 signaling by imatinib (5  $\mu$ M) and nilotinib (100 nM) for 24  
138 h, by mass cytometry analysis using phospho-specific antibodies (Gullaksen, Skavland et al.,  
139 2017). The level of phosphorylation of CRKL, STAT5 and CREB among others, were all  
140 reduced following imatinib and nilotinib treatment in Kcl-22 cells with similar strength of effect  
141 between these two inhibitors and thereby not explaining difference in TNT formation (Fig 2E and  
142 Supplementary Figure S2B).

### 143 **TNT formation and increased cell surface adhesion induced by drug treatment**

144 IFN $\alpha$  has previously been shown to induce cell adherence of CML cells by restoring  $\beta$ 1 integrin  
145 function (Bhatia & Verfaillie, 1998, Dowding et al., 1991). To study the role of cell adherence  
146 through  $\beta$ 1 integrin in TNT formation, we pre-incubated Kcl-22 cells for 30 min with a blocking  
147 antibody against  $\beta$ 1 integrin before 1 h treatment with either IFN $\alpha$  (100 U/ml) or nilotinib (100  
148 nM). Kcl-22 cells not pre-incubated with the blocking antibody showed changes in cell  
149 morphology and a significant change in cell surface area ( $\mu\text{m}^2$ ) on fibronectin coated culture

150 wells following nilotinib treatment, whereas IFN $\alpha$  treatment only resulted in altered morphology  
151 without significant changes in cell surface area (Fig 3A-B). Strikingly, these nilotinib and IFN $\alpha$ -  
152 induced changes in cell morphology were completely blocked by pre-incubation with the  $\beta$ 1  
153 integrin blocking antibody (Fig 3C-D). When measuring cell motility by time-lapse microscopy,  
154 we found that the IFN $\alpha$  and nilotinib-induced change in cell morphology was associated with a  
155 significant decrease in cell motility. Conversely, pre-treatment with the  $\beta$ 1 blocking antibody  
156 resulted in increased cell motility (Figure 3C-D) suggesting a direct connection between  
157 increased functionality of integrin  $\beta$ 1 and cell adherence, here induced by IFN $\alpha$  and nilotinib; and  
158 TNT formation.

#### 159 **K562 and Kcl-22 cell lines show different GTPase profiles**

160 Cell adherence and motility can be regulated by the Rho family of small GTPases, including  
161 Rac1, Rho and Cdc42 (Keely, Westwick et al., 1997). Cdc42 and Rac1 have both been suggested  
162 to play important roles in TNT biogenesis in macrophages (Hanna, McCoy-Simandle et al., 2017,  
163 Hase, Kimura et al., 2009). We therefore examined the involvement and activity of these  
164 GTPases in cell adherence and TNT formation following nilotinib treatment (100 nM 1h) by  
165 GTPase pull-down assays. We found that the total Rac1 protein was weakly expressed in K562  
166 cells with undetectable levels of the active form, whereas the Kcl-22 cells showed higher total  
167 expression and activity of Rac1 (Fig 4A). Compared to Kcl-22 cells, K562 cells showed higher  
168 expression and activity of Rho and higher activity of Cdc42 (Fig 4 B and C). However,  
169 treatments with nilotinib did not result in any major changes in total protein expression or in the  
170 activity of these GTPases (Fig 4A-C). These data indicate that formation of TNTs is not  
171 dependent upon the activity of the investigated Rho family GTPases. Still, the differences in  
172 expression and activity of these proteins at basal level between the two cell lines might explain



173 some of the differences in their TNT-response after BCR-ABL1 inhibition. Treatment with  
174 imatinib or nilotinib caused reduction in the total expression of the Rac1 guanine exchange factor  
175 (GEF) protein Tiam-1 in the Kcl-22 cells, which was not observed in the K562 cells (Fig 4D). To  
176 further investigate the relation between TNT formation and Rac1 we examined the BCR-ABL1  
177 negative AML cell line HL-60 which expressed high levels of Rac1 and low levels of TNTs  
178 (Omsland et al., 2017). HL-60 cells treated with nilotinib (100 nM, 24 h) showed no TNT  
179 induction (Figure 4E). These results indicate an involvement of BCR-ABL1 in nilotinib-induced  
180 TNT formation in Kcl-22 cells.

### 181 **Nilotinib-induced TNT formation in CML cells is blocked by co-culture with human** 182 **derived mesenchymal stromal cells**

183 The interaction between mesenchymal stromal cells (MSCs) and CML cells is important for  
184 disease etiology, particularly in modulation of drug sensitivity (Weisberg & Griffin, 2012). We  
185 hypothesized that the contact between CML cells and stroma cells might affect formation of  
186 TNTs. Therefore, we seeded Kcl-22 cells on a layer of MSC-derived SAOS-2 cells  
187 (osteosarcoma cell line) or on human-derived primary healthy MSCs and analyzed TNT  
188 formation between CML cells in response to nilotinib. Co-culturing demonstrated near complete  
189 blockage of TNT formation in the Kcl-22 cells (Fig 5A and data not shown). To further  
190 investigate if this inhibitory effect on TNT formation was dependent on physical contact between  
191 the CML cells and stromal cells, we incubated the Kcl-22 cells in conditioned medium from the  
192 human-derived MSCs and this resulted in inhibition of TNT-induction by nilotinib (Fig 5B). This  
193 suggested the existence of common factors secreted from SAOS-2 cells and MSCs inhibiting  
194 TNT formation between CML cells. Two common factors secreted by SAOS-2 and MSCs both in

195 mono-culture and in co-culture with leukemic cells are CXCL8 (interleukin-8) and vascular  
196 endothelial growth factor (VEGF) (Bruserud, Tronstad et al., 2005, Polak et al., 2015).

197 This prompted us to treat Kcl-22 cells with CXCL8 (20 ng/ml, 24 h) or VEGF (20 ng/ml, 24 h)  
198 alone or together with nilotinib (100 nM, 24 h). No change in TNTs was found after treatment  
199 with CXCL8 alone, however, co-treatment with CXCL8 and nilotinib resulted in reduced TNT  
200 formation compared to nilotinib treatment alone (Figure 5C). In contrast, co-treatment with  
201 VEGF and nilotinib resulted in increased TNT formation (Fig 5D). Interestingly, when we  
202 measured the concentration of CXCL8 in the cell supernatants of Kcl-22 cells by ELISA, we  
203 found a reduced CXCL8 concentration after treatment with nilotinib (100 nM) for 24 h (Fig 5E).  
204 This CXCL8 reducing effect by nilotinib has previously been reported in nilotinib-treated  
205 patients who showed reduced CXCL8 plasma concentrations (Hantschel, Gstoettenbauer et al.,  
206 2008). However, when Kcl-22 cells were co-cultured with SAOS-2 cells an increase in CXCL8  
207 was found in the cell supernatants in nilotinib-treated co-cultures compared to control. No further  
208 difference in CXCL8 levels was measured following nilotinib treatment if CXCL8 was added to  
209 the Kcl-22 cells alone (Fig 5F). This suggests that an excess of CXCL8 will counteract the TNT-  
210 inducing effect of nilotinib. Furthermore, flow cytometry analysis revealed that only the Kcl-22  
211 cells expressed the CXCL8 receptor CXCR2 (Fig 5G). We further verified the importance of  
212 CXCL8 in TNT formation by treating the Kcl-22 cells with antibodies against CXCL8 and by  
213 blocking the CXCR2 receptor by treatment with reparixin. A slight increase of TNTs was  
214 observed after 24 h treatment with 0.2 µg/ml and 0.4 µg/ml CXCL8 blocking antibody or  
215 reparixin (1, 10 and 100 nM for 24 h) (Fig 5H and I), but no dramatic change in cell morphology  
216 was observed (Supplementary figure 3 A and B). Taken together these results suggests that an  
217 intact CXCL8 signaling pathway in the Kcl-22 cells could be part of the observed TNT

218 modulation following nilotinib treatment, but and inhibition of the CXCL8 pathway alone is not  
219 sufficient for a significant induction of TNTs.

220 **Differentiation of Kcl-22 cells by ATRA increases CXCL8 secretion inhibiting the TNT-**  
221 **induction by nilotinib**

222 All-trans retinoic acid (ATRA) differentiate leukemic blast cells to mature myeloid cells (Collins,  
223 Gallo et al., 1977) and influence NF- $\kappa$ B regulation and CXCL8 production (Dai, Yamasaki et al.,  
224 2004). To further investigate the connection between CXCL8 and TNT formation, Kcl-22 cells  
225 were treated for five consecutive days with ATRA (1  $\mu$ M) to induce differentiation followed by  
226 24 h treatment with nilotinib (100 nM). Interestingly, pre-treatment with ATRA completely  
227 prevented nilotinib-induced TNT formation (Fig 6A). Indeed, the concentration of CXCL8 was  
228 increased in the cell supernatant of the Kcl-22 cells following incubation with ATRA, whereas  
229 nilotinib treatment resulted in a reduction of CXCL8 comparable to untreated Kcl-22 cells (Fig  
230 6B). Although the ATRA-treatment resulted in 30% differentiation of the Kcl-22 cells after May-  
231 Grünwald Giemsa staining (Fig 6C and D), no change in cell surface CXCR2 expression was  
232 found by flow cytometry analysis (Figure 6E). Together, these data indicate that ATRA treatment  
233 may prevent formation of TNTs by increasing signaling through an autocrine CXCL8-CXCR2  
234 pathway.

235

236

237

238

239

## Discussion

240 TNT is a dynamic 50-200 nm structure consisting of plasma membrane and F-actin, but with  
241 elusive regulatory mechanisms (Zaccard, Rinaldo et al., 2016). Since the BCR-ABL1 fusion  
242 protein in CML has a strong impact on F-actin and simultaneously affects various signaling  
243 pathways (Van Etten, Jackson et al., 1994) we examined the effect of BCR-ABL1 on TNT  
244 formation. Both bone marrow derived BCR-ABL1 positive cells from CML patients and cell  
245 lines displayed low numbers of TNTs compared to acute myeloid leukemia cells and other cancer  
246 cells (Hase et al., 2009, Omsland et al., 2017, Reichert et al., 2016). A possible explanation for  
247 the low TNT numbers could include the observation that CML cells adhere poorly to the bone  
248 marrow stroma (Gordon et al., 1987), consequently resulting in interrupted cellular TNT  
249 communication. TNT formation between cells *in vitro* is highly dependent on adherence, and  
250 culturing leukocytes on a supportive layer of mesenchymal stem cells (MSCs) or fibronectin  
251 increase TNT formation (Osteikoetxea-Molnar, Szabo-Meleg et al., 2016, Reichert et al., 2016).  
252 IFN $\alpha$  was the first effective CML therapy and is now being re-evaluated in combination with  
253 TKIs like dasatinib (Apperley, 2015, Hjorth-Hansen et al., 2016). Interestingly, one of the  
254 proposed mechanisms for the efficacy of IFN $\alpha$  in treatment of CML patients was through its  
255 ability to restore adhesion of CML cells to the bone marrow stroma (Dowding, Gordon et al.,  
256 1993). Similarly, TKI treatments result in increased CML cell adherence to fibronectin (Obr et  
257 al., 2014). Together, these observations suggest that restoration of adherence in CML cells could  
258 be central to successful treatment of CML patients.

259 Interestingly, both increased adhesion and change in morphology was observed in the two CML  
260 cell lines after imatinib treatment, accompanied by a significant increase in TNT formation.  
261 However, treatment with nilotinib as well as IFN $\alpha$  induced adhesion and TNT formation in Kcl-

262 22 cells, but not in K562 cells (Fig 1B, D and Fig 3A). Evidence for an involvement of BCR-  
263 ABL1 in TNT formation was obtained using the doxycycline-inducible system of BCR-ABL1  
264 expression in the Ba/F3 cells. BCR-ABL1 induction caused these cells to appear more  
265 morphologically spherical compared to the Ba/F3 control cells (Figure 2D). This confirmed  
266 observations by others where BCR-ABL1 expression in Ba/F3 cells induced cell detachment, and  
267 increased motility (Salgia, Li et al., 1997).

268 To verify the importance of cell adhesion in TNT induction we incubated Kcl-22 cells with an  
269 integrin  $\beta$ 1 blocking antibody before treatment with IFN $\alpha$  or nilotinib. Indeed, we found that the  
270 cell adhesion effect by the two therapeutics were dependent of  $\beta$ 1 integrin (Fig 3C). The Kcl-22  
271 cells showed increased mobility and a more spherical shape after pre-incubation with the integrin  
272  $\beta$ 1 blocking antibody (Fig 3D). Together with the results obtained in the Ba/F3 cell model  
273 system, this supports a hypothesis where these CML cells form few TNT structures when  
274 adhering poorly to fibronectin as a consequence of showing a spherical appearance.

275 The RhoGTPases are known to have an impact on F-actin and cell mobility, and also to be  
276 implicated in BCR-ABL1 dependent CML leukemogenesis (Harnois, Constantin et al., 2003). It  
277 was therefore of interest to investigate the GTPase activity in K562 and Kcl-22 cells. We were  
278 unable to demonstrate active Rac1 in the K562 cells in contrast to the Kcl-22 cells where Rac1  
279 was slightly down-regulated Rac1 after nilotinib treatment (Fig 4A). Even though the HL-60 cell  
280 line express high levels of Rac1, no induction of TNTs or any increase in cell adhesion was  
281 observed after nilotinib treatment in these cells (Figure 4E) suggesting that nilotinib-induced  
282 TNT formation could be dependent on the BCR/ABL1/Rac1 pathway. The observed difference in  
283 the basal Rho GTPase profiles in these two CML cell lines could represent part of the explanation  
284 for the difference in TNT-induction caused by nilotinib and IFN $\alpha$ .

285 Intercellular communication between leukemic cells and bone marrow stromal cells have a major  
286 impact on the leukemic cells (Paraguassu-Braga, Borojevic et al., 2003). Therefore, we  
287 investigated if nilotinib treatment also induced TNTs in CML cells in co-culture with stromal  
288 cells or the MSC-derived osteosarcoma cell line SAOS-2. Interestingly, the TNT inducing effect  
289 was abolished when Kcl-22 cells were seeded on a confluent layer of the osteosarcoma cell line  
290 SAOS-2 (Fig 5A) or when incubated in conditioned medium from MSCs (Fig 5B). This  
291 observation suggests that common extracellular secreted factors from these cells are inhibiting  
292 the nilotinib induced TNT formation. Cytokines have previously been suggested to have an effect  
293 on TNT formation in natural killer (NK) cells (Chauveau et al., 2010) and the cytokine CXCL8  
294 as well as the growth factor VEGF are both secreted by both SAOS-2 and healthy bone marrow  
295 stromal cells (Bruserud et al., 2005, Polak et al., 2015). When the Kcl-22 cells were incubated  
296 with CXCL8 or VEGF together with nilotinib treatment, CXCL8, but not VEGF, inhibited the  
297 nilotinib-induced TNT formation (Fig 5C, D).

298 Multiple studies have demonstrated the pro-survival properties of CXCL8 on CML cells, and also  
299 that the CML cells themselves can release CXCL8 (Corrado, Raimondo et al., 2014). In addition,  
300 CML cells release exosomes that in turn can induce CXCL8 production and extracellular  
301 secretion from the bone marrow stroma cells resulting in increased survival of CML cells  
302 (Corrado et al., 2014). Previously, a reduction of CXCL8 in the serum of CML patients treated  
303 with imatinib has been demonstrated and dasatinib and nilotinib treatment of K562 cells caused  
304 down-regulated CXCL8 gene expression and secretion by the K562 cells (Hantschel et al., 2008).  
305 Here we report low levels of CXCL8 secretion by Kcl-22 cells, that was further decreased  
306 following nilotinib treatment (Fig 5E) (Hantschel et al., 2008). When CXCL8 concentrations  
307 were increased in the cell supernatant of the Kcl-22 cells, either by culturing with SAOS-2 cells

308 or by adding excess CXCL8 to the Kcl-22 monoculture, the TNT-inducing effect of nilotinib was  
309 abolished (Fig 6A, C). This suggests an involvement of CXCL8 in TNT biogenesis. Further  
310 support of this involvement is the expression of CXCR2 on the cell surface of Kcl-22 cells, but  
311 not in K562 cells, suggesting a potential autocrine-loop that merits further investigation.

312 All-trans retinoic acid (ATRA) has been shown to induce CXCL8 production in human  
313 keratinocytes to expression of functional CXCL8 receptors on HL-60 cells (Dai et al., 2004,  
314 Sham, Phatak et al., 1995). We investigated if CXCL8 was increased in the cell supernatant of  
315 Kcl-22 cells after treatment with ATRA and the effect of increased CXCL8 production on TNT  
316 formation by treating Kcl-22 with ATRA. When Kcl-22 cells were treated with ATRA for five  
317 days the CXCL8 concentration in the cell supernatant was increased compared to untreated  
318 control cells and subsequently treatment with nilotinib for 24 h resulted in reduction of CXCL8  
319 (Fig 6B). Approximately 30% of the Kcl-22 cells differentiated to neutrophil granulocytes as  
320 determined by May-Grünwald staining (Fig 6C and D), but the total surface CXCR2 expression  
321 remained unchanged (Fig 6E).

322 Taken together, we find that imatinib treatment induces TNT formation in the CML cell lines  
323 Kcl-22 and K562. TNTs were induced in Kcl-22 cells, but not K562 cells, following IFN $\alpha$  and  
324 nilotinib treatment. We propose that TNT induction caused by IFN $\alpha$  and nilotinib is correlated to  
325 increased cell adhesion involving  $\beta$ 1-integrin, potentially also including the BCR-ABL1/CXCL8  
326 pathway (Fig 7). The functional consequences of TNT induction needs to be further investigated.

327

328

329

## Materials and Methods

### 330 Cell lines

331 K562, Kcl-22 and Ba/F3 cells (ATCC and DSMZ) were cultured according to provider's  
332 instructions. RPMI-1640 medium was supplemented with 10% FBS, 1% L-glutamine (2mM) and  
333 1% (1.0 U/ml) penicillin and streptomycin (5mM) (Sigma-Aldrich). The RPMI-1640 medium for  
334 the IL-3 dependent Ba/F3 cells were additionally supplemented with 10% conditioned medium  
335 from WEHI3B cells (mouse myelomonocytic cell line) known to secrete high amounts of IL-3  
336 (Lee, Hapel et al., 1982). The WEHI3B cells were grown to confluency in a T75 flask with  
337 complete IMDM medium (containing 10 % FBS, 1 % Pen-Strep and L-glutamine), and cultured  
338 for 2-3 days before the supernatant was centrifuged at 1500 RPM for 10 min and sterile filtered  
339 through a 0.2 µm filter.

340

### 341 Mem-GFP transduced cells

342 The memGFP-Kcl-22 and mem-GFP-K562 cells were generated by transducing the cells with  
343 ready-to-use lentiviral particles expressing a membrane localization signal (20 amino acids of the  
344 N-terminal part of neuromodulin, containing a palmitoylation signal) fused to GFP; rLV-EF1-  
345 AcGFP-Mem-9 (Takara, rV2.1A1.1941 C2) according to the provider's instructions. The  
346 transduced cells were sorted using BD FACS Aria SORP at the Flow Cytometry Core Facility,  
347 Department of Clinical Science, University of Bergen, Norway.

348

### 349 Primary cells

350 The study was conducted in accordance with the Declaration of Helsinki and approved by the  
351 local Ethics Committee (Regional Ethics Committee West projects 2012/2245 and 2012/2247,



352 University of Bergen, Norway). Blood and bone marrow samples from consecutively diagnosed  
353 CML patients were collected after informed consent and were processed by density gradient  
354 separation (Lymphoprep, Axis-Shield, Oslo, Norway) (Bruserud, Gjertsen et al., 2001).

355

### 356 **Doxycycline inducible Ba/F3 cells**

357 BCR-ABL1 (P210) was cloned into pcDNA3 (Adgene) after EcoRI digestion. The orientation  
358 and sequence was verified by PCR. This was further sub-cloned into the EcoRI site of PLVX-  
359 tetOne-Puro (from the Lenti-X Tet-One Inducible Expression Systems). Wild type Ba/F3 (kind  
360 gift to Prof. Enserink from Prof. Gordon Mills laboratory, Houston, Texas, USA) was transfected  
361 with 2 µg of the PLVX\_tetOne\_BCR-ABL1 plasmid or PLVX\_tetOne\_empty vector by  
362 electroporation (Amaxa biosystems nucleofector II: program U20) using Ingenio Electroporation  
363 solution (catalog number MIR 50114). Transfected cells were cultured in medium for 24-72 h  
364 before selection with 1 µg/ml puromycin. Puromycin resistant clones were sorted and grown  
365 independently; cells were continually cultured in medium with puromycin to maintain selection  
366 pressure. 0.1 µg/ml doxycycline was added to induce expression of BCR-ABL1.

367

### 368 **Antibodies and reagents**

369 The following primary antibodies were used for immunofluorescence and/or immunoblotting:  
370 anti-β-tubulin (clone TUB 2.1, Sigma-Aldrich), anti-COX IV (ab16056), anti-GAPDH (ab9485,  
371 abcam) anti-cAbl ((24-11) sc-23, Santa Cruz Biotechnology), Tiam-1 (C-16, sc-872, Santa Cruz  
372 Biotechnology), anti-integrin β1 blocking antibody [P5D2] (ab24693, Abcam), anti-Rac1 (from  
373 active Rac-1 pull-down and detection kit cat#16118, ThermoFischerScientific), anti-Cdc42 (from  
374 active Cdc42 pull-down and detection kit cat#16119, ThermoFischerScientific) and anti-Rho

375 (detecting RhoA, RhoB and RhoC), (from active Rho pull-down and detection kit cat#16116,  
376 ThermoFischerScientific). Secondary antibodies used for immunofluorescence or  
377 immunoblotting; Alexa Fluor<sup>®</sup> 488- or 594-conjugated goat-anti-mouse (Invitrogen), horseradish  
378 peroxidase (HRP)-conjugated goat anti-rabbit/mouse (Jackson Immunoresearch). The following  
379 were used for actin and membrane staining; AlexaFluor<sup>®</sup> 350-conjugated phalloidin and wheat  
380 germ agglutinin (WGA) –Alexa Fluor<sup>®</sup> 594 or 488 (Invitrogen) as previously described  
381 (Omsland et al., 2017). Tyrosine kinase inhibitors: Imatinib and Nilotinib (Selleckchem).  
382 Interferon alpha (IFN $\alpha$ ) (Intron A from MSD), Cytochalasin D (Sigma-Aldrich), doxycycline  
383 (Doxyferm, Nordic Drugs AB, Limhamn), puromycin (Sigma-Aldrich), May-Grünwald (Merck  
384 KgaA), Giemsa (Merck KgaA), Sören phosphate buffer (Hospital Pharmacy Haukeland  
385 University Hospital), Bovine serum albumin (BSA) fraction V (Roche), All-trans retinoic acid  
386 (ATRA) (Sigma-Aldrich), fibronectin (Sigma-Aldrich), anti-CXCL8 (R&D systems) and  
387 reparixin (Cayman chemical).

388

### 389 **TNT identification and quantification**

390 A TNT in this study is defined as a thin straight structure,  $\leq 200$  nm in diameter, minimum 5  $\mu$ m  
391 in length, hovering above the substratum, connecting two cells. TNTs were distinguished from  
392 cytoplasmic bridges, which appear following cell division, by the lack of a midbody clearly  
393 visible by differential interference contrast and/or staining of cellular membranes (Omsland et al.,  
394 2017). 8-well  $\mu$ -slides (Ibidi GmbH) were pre-coated with fibronectin (10  $\mu$ g/ml, F2006, Sigma-  
395 Aldrich) for 30 min at 37°C before washing with saline. 70000 cells were seeded per well and  
396 incubated overnight under physiological conditions. Primary CML cells were seeded in DMEM  
397 medium containing 20% FBS overnight and stained with wheat germ agglutinin conjugated with  
398 alexa fluor 488 or 594 (1.67  $\mu$ g/ml) as previously described (Omsland et al., 2017). Cells were

399 examined live by fluorescent light microscopy (Zeiss Axio Observer Z1 with AxioVision 4.8.2 or  
400 Zen software) using a 63X/1.4 NA Oil DICIII objective, heat block (37°C) and standard air  
401 conditions. 100 cells per well were counted following a fixed counting pattern with 5-6 cells  
402 examined per vision field. The result is described as number of TNTs/100 cells meaning the total  
403 number of TNTs (one TNT always connects two cells) among 100 cells counted. For further  
404 details see Supplementary Figure in Omsland et al (Omsland et al., 2017). Cell viability was  
405 monitored by Hoechst 3342 (Sigma) staining as previously described (McCormack, Haaland et  
406 al., 2012).

407

#### 408 **Blocking of integrin $\beta$ -1**

409 Cells were cultured in a  $0.7 \times 10^6$  cells/ml density in a 6-well plate. Cells were incubated in  
410 medium without or with 10  $\mu$ g/ml of anti-integrin beta 1 [P5D2] antibody for 30 min before  
411 seeded to fibronectin pre-coated  $\mu$ -slides (Ibidi GmbH). Cells were incubated for 3 h to allow  
412 attachment before treatment with 1  $\mu$ M nilotinib (nilo) or 100 U/ml IFN $\alpha$  1 h prior to  
413 examination by live microscopy.

414 Measuring of cell area was performed manually using ImageJ: Images were analyzed as 8-bit  
415 files using FFT Bandpass Filter, threshold was set manually and adjusted until cells were  
416 distinguished from the background>convert to mask>fill holes>cells in close proximity were then  
417 distinguished using watershed algorithm. Measuring of the cell area was performed using the  
418 measure tool under the region of interest manager tool and single cells were selected using the  
419 wand tool.

420 Tracking of cells was performed using metamorph and the chemotaxis and migration (Ibidi  
421 GmbH) plugin to ImageJ was performed to calculate accumulated distance and to make trajectory  
422 plots as described in (Hurley, Smith et al., 2013).

423

#### 424 **Immunofluorescence**

425 The F-actin and microtubule presence in TNTs was investigated in Kcl-22 cells (on 8-well  $\mu$ -  
426 slides, Ibidi GmbH) fixed in 4% PFA in PBS and 0.2% glutaraldehyde in PBS for 20 min at room  
427 temperature (RT) followed by one wash with PBS, before permeabilized for 1 min using 0.2%  
428 Tween<sup>®</sup> in PBS and washed twice with PBS. Cells were blocked with 0.5% Bovine Serum  
429 Albumin Fraction V (BSA) PBS for 20 min at RT and then incubated for 1 h at RT in the dark  
430 with 33nM AlexaFluor<sup>®</sup> phalloidin, washed once with PBS and incubated with anti- $\beta$ -tubulin  
431 antibody (1:200 in blocking solution) overnight at 4°C. Then cells were washed twice with PBS  
432 and incubated with Alexa-488 or 594 goat-anti-mouse antibodies (1:5000 in blocking solution)  
433 for 1h at RT, before washed twice with PBS and examined by fluorescence microscopy. Cells not  
434 expressing memGFP were stained with wheat germ agglutinin (WGA) conjugated with Alexa  
435 488 or 594 for 8 min followed by one wash with PBS before examined by microscopy and  
436 manual quantification of TNTs.

437

#### 438 **Scanning electron microscopy (SEM)**

439 500 0000 cells were seeded on L-lysine pre-coated coverslips followed by incubation at 37°C  
440 overnight before fixed (4 % glutaraldehyde in 0.2 M Na-cacodylate in buffer diluted 1:1 with  
441 medium) for 2 h at RT. Cells were carefully washed three times for 15 min using 0.1 M Na-  
442 cacodylate buffer followed by 60 min post-fixation with 1% osmiumtetraoxide in 0.1 M Na-  
443 cacodylate buffer and washed twice for 10 min with 0.1 M Na-cacodylate buffer. Dehydration  
444 was performed with 30 % ethanol for 15 min, 50 % ethanol for 15 min, 70 % ethanol for 20 min  
445 or overnight, 96 % ethanol for 20 min and twice with 100 % ethanol for 20 min. The coverslips

446 were obtained from the wells and placed on SEM stubs before incubated in a heat-incubator  
447 overnight. Critical point drying was omitted in order to avoid breakage of TNTs. The SEM stubs  
448 were coated with 5-10 nm gold/palladium before analyzed by SEM microscopy.

449

#### 450 **Immunoblotting**

451 Cells were lysed and analyzed by immunoblotting according to standard protocol (Shieh, Taya et  
452 al., 1999, Silden, Hjelle et al., 2013). Briefly, immunoblotting was performed using precast gels  
453 from BioRad, transferred to PVDF membranes using Pierce G2 fast blotter (Thermo Scientific).  
454 Membranes were blocked for 1h at RT in 5% fat-free drymilk or 3% BSA in TBST, incubated  
455 with primary antibody at 4°C overnight. Membranes were washed with TBST followed by  
456 incubation for 1 h with secondary antibody ((HRP)-conjugated goat-anti-rabbit/mouse) was  
457 diluted 1:1000 in 5% drymilk in TBST and washed with TBST before developed using  
458 SuperSignal West pico or femto (Thermo Fisher Scientific). Developed immunoblots were  
459 detected and captured by ImageQuant LAS 4000 (GE Healthcare Life Sciences). Quantification  
460 of immunoblot bands were performed on 16-bit original files using 1D gel analysis option in  
461 ImageQuant TL version 8.1 (GE healthcare). Lane creation was performed with the manual  
462 option and background was subtracted using the manual baseline option in this program. The  
463 final value after background subtraction was used for calculating the ratio relative to the loading  
464 control.

465

#### 466 **RhoGTPase activity assays**

467 All RhoGTPase assays were performed according to the manufacture protocol of the individual  
468 GTPase pulldown activity assays used (ThermoFischerScientific). Briefly,  $10 \times 10^6$  cells were  
469 treated with 100 nM nilotinib for 1 h before washed and lysed in lysis/wash buffer with protease

470 inhibitors, incubated on ice for 10 min before centrifugation at 12 000 x g for 15 min. Protein  
471 concentration was measured using the Bradford Assay. GTP $\gamma$ S was used as a positive control and  
472 GDP as a negative control. In each reaction 500  $\mu$ g cell lysates were used added 10 mM EDTA  
473 and 0.1 mM GTP $\gamma$ S or GDP followed by incubation at 30°C for 15 min with shaking (300RPM).  
474 The reaction was stopped by adding 60 mM MgCl<sub>2</sub> on ice. The pull-down was performed with  
475 500-1000  $\mu$ g cell lysate. For pull-down of active Rho, 400  $\mu$ g GST-Rhotekin-PBD together with  
476 glutathion resin was used, for Rac1 and Cdc42 20  $\mu$ g GST-PAK1-PBD was used. Fresh  $\beta$ -  
477 mercaptoethanol was added to the 2x sample buffer included in the kit. Regular immunoblotting  
478 was performed as earlier described, where 28  $\mu$ l of the eluted samples were applied to gels.

479

#### 480 **Flow cytometry**

481  $0.5 \times 10^6$  cells were centrifuged for 5 min, 200 RCF at 4°C, washed once with saline, centrifuge  
482 and blocked in 0.5% BSA in PBS for 15 min on ice. Cells were incubated with primary antibody  
483 CXCR2 (0.5  $\mu$ g/ml final concentration) for 30 min on ice, washed twice with blocking solution  
484 and incubated with secondary antibody (goat-anti mouse alexa-fluor-647) for 20 min on ice,  
485 before washed twice and analyzed using Guava easy cyte<sup>TM</sup> (Millipore) flow cytometer by the  
486 Guava Soft version 2.2.2 software. Flow cytometry results were analyzed using FlowJo 10.1  
487 (Treestar).

488

#### 489 **All-trans retinoic acid (ATRA) treatment and differentiation**

490  $2 \times 10^6$  cells were seeded in 25 cm<sup>3</sup> flasks with medium only or 1  $\mu$ M ATRA. All experiments  
491 including ATRA were performed protected from light exposure. After three days of incubation  
492 the cells were centrifuged and resuspended in freshly made medium with or without ATRA and  
493 incubated for additional 48 h.  $1 \times 10^6$  cells were used for preparation of supernatants for ELISA

494 analysis, microscopy and flow cytometry. The remaining were seeded onto a 6-well plate and  
495 incubated with or without 100 nM nilotinib for 24 h following lysis and fixation for western blot  
496 analysis and mass cytometry, respectively.

497

#### 498 **May-Grünwald Giemsa staining**

499 Cells were cytospun 4 min, 400 RPM, air-dried and cells were circled using a PAP-pen. Cells  
500 were fixed by incubation for 20 min in methanol and further stained with freshly made May-  
501 Grünwald solution diluted 1:1 in Sörens phosphate buffer for 15 min at RT followed by Giemsa  
502 staining (diluted 1:10 in Sörens phosphate buffer) for 5 min before washing in Sörens phosphate  
503 buffer. Cells were air dried before examined by bright field microscopy.

504

#### 505 **ELISA**

506 A human CXCL8 quantikine sandwich ELISA (R&D systems) was performed according to the  
507 manufacture's protocol. Supernatants were collected from the  $\mu$ -wells (Ibidi GmbH) after TNT  
508 quantification for the co-cultures and CXCL8 supplemented in the medium of Kcl-22 cells. To be  
509 able to detect CXCL8 values in control samples of Kcl-22 cells,  $1 \times 10^6$  cells were incubated with  
510 or without 100 nM nilotinib for 24 h. For the ATRA pre-treated cells and untreated controls, the  
511 cells were collected at day 5, centrifuged and prepared for nilotinib treatment as described  
512 above.

513

#### 514 **Mass Cytometry**

#### 515 **Barcoding**

516 To reduce experiment variability, workload and antibody consumption, we used the  
517 commercially available metal barcoding kit from Fluidigm. Briefly, the cells from each sample  
518 were stained with a unique three-palladium isotope combination; three chosen from six available;  
519 Pd 102, Pd 104, Pd 105, Pd 106, Pd 108, Pd 110 (20 unique combinations available). After cell  
520 barcoding and washing according to the manufacturers' recommendations, uniquely barcoded  
521 samples were pooled for further processing for mass cytometry analysis.

## 522 **Antibody staining**

523 A pool of barcoded cells was stained with a panel of cell surface markers (30 minutes, RT) and  
524 permeabilized with methanol (-20°C). Further staining with intracellular phospho-specific  
525 antibodies (30 minutes, RT) followed. Cells were then washed and re-suspended in the buffer  
526 containing Iridium-intercalator (natural abundance iridium as pentamethylcyclopentadienyl-  
527 Iridium (III)-dipyridophenazine), which intercalates into the DNA (1 hour, 4°C), before washed  
528 and pelleted by centrifugation. Immediately prior to data acquisition cells were re-suspended to a  
529 final concentration of approximately  $5 \times 10^5$  cells/mL in MaxPar water (Fluidigm) containing  
530 normalization beads (1:10 dilution, Fluidigm) and analyzed on a Helios mass cytometer  
531 (Fluidigm), placed in the Flow Cytometry Core Facility of Bergen, University of Bergen.

## 532 **Single cell discrimination and barcoding de-convolution**

533 Using the normalization beads and the normalization software, any drift in the data resulting  
534 from loss of detector sensitivity was abrogated. An automatic barcode deconvolution algorithm  
535 developed by Zunder *et al* 2015 (Zunder, Finck et al., 2015) was used to identify each uniquely  
536 barcoded sample. Further discrimination and gating of single cells was achieved by plotting all  
537 events by DNA-content (Ir 191 or Ir 103) versus Event Length (number of pushes). Together,



538 barcode deconvolution and gating of cells on DNA content versus event length, is an effective  
539 filter for removal of doublets and identification of single cells. Finally, cleaved Caspase 3 readily  
540 discriminated between apoptotic and non-apoptotic cells, where non-apoptotic cells were used  
541 for statistical analysis.

542 Table 1 Antibody panel for mass cytometry analysis

| A.m.u | Metal | Epitope                  | Clone      | Vendor                      |
|-------|-------|--------------------------|------------|-----------------------------|
| 102   | Pd    | Metal Barcode Channel #1 | N.A.       | Fluidigm                    |
| 104   | Pd    | Metal Barcode Channel #2 | N.A.       | Fluidigm                    |
| 105   | Pd    | Metal Barcode Channel #3 | N.A.       | Fluidigm                    |
| 106   | Pd    | Metal Barcode Channel #4 | N.A.       | Fluidigm                    |
| 108   | Pd    | Metal Barcode Channel #5 | N.A.       | Fluidigm                    |
| 110   | Pd    | Metal Barcode Channel #6 | N.A.       | Fluidigm                    |
|       |       |                          |            |                             |
| 89    | Y     | CD45                     | HI30       | Fluidigm                    |
| 141   | Pr    | pBCR Y177                | Polyclonal | Cell Signaling Technologies |
| 142   | Nd    | Caspase 3 Cleaved        | D3E9       | Fluidigm                    |
| 143   | Nd    | pCrkL [Y207]             | Polyclonal | Fluidigm                    |
| 149   | Sm    | p4E-BP1                  | 236B4      | Fluidigm                    |
| 150   | Nd    | pStat5 [Y694]            | 47         | Fluidigm                    |
| 153   | Eu    | pStat1 [Y701]            | 58D6       | Fluidigm                    |
| 154   | Sm    | pAbl Y245                | 73E5       | Cell Signaling Technologies |
| 156   | Gd    | p-p38 [T180/Y182]        | D3F9       | Fluidigm                    |
| 158   | Gd    | pStat3 [Y705]            | 4/P-STAT3  | Fluidigm                    |
| 165   | Ho    | pCREB [S133]             | 4/P-STAT3  | Fluidigm                    |
| 167   | Yb    | pERK 1/2 [T202/Y204]     | D1314.4E   | Fluidigm                    |
| 172   | Yb    | pS6 [S235/S236]          | N7-548     | Fluidigm                    |
| 176   | Yb    | pS6 [S240/S244]          | D68F8      | Cell Signaling Technologies |
|       |       |                          |            |                             |
| 191   | Ir    | DNA                      | N.A.       | Fluidigm                    |
| 193B  | Ir    | DNA                      | N.A.       | Fluidigm                    |

543  
544 **Statistical analysis**  
545 Differences between two groups were analyzed by two-tailed unpaired T-test using GraphPad  
546 Prism 6 Version 6.03. F-test was performed to verify that the internal variance in the groups were  
547 not significant. Significant difference was considered by a P-value <0.05. For cell area and cell  
548 movement unpaired Mann Whitney tests were performed.

549

550

551

## **Acknowledgments**

552 The confocal and SEM imaging was performed at the Molecular Imaging Center, Department of  
553 Biomedicine, University of Bergen. We thank Dr. André Sulen for help with sorting the K562-  
554 mem-GFP and Kcl-22-mem-GFP cells and Calum Leitch and Dr. Genoveffa Franchini for helpful  
555 feedback on the manuscript. We thank Dr. Tatiana Karpova for assistance with the analysis of  
556 cell movement.

557

## **Author contributions**

558 MO: was involved in designing the study, performed the experiments, analyzed the data and  
559 wrote paper, VA, designed study, performed experiments, analyzed the data and wrote the paper,  
560 BTG: designed study, analyzed data and wrote the paper. SEG performed mass spectrometry  
561 experiments, MPAD generated the BCR-ABL1 doxycycline inducible Ba/F3 cells and wrote the  
562 paper, JE provided cell lines and wrote the paper. RH diagnosed CML patients and verified CML  
563 cell lines and wrote paper.

564

## **Conflict-of-interest**

565 The authors declare no conflict of interest.

566

## **Funding**

567 This study was supported by University of Bergen (MO), Norwegian Cancer Society with  
568 Solveig & Ole Lunds Legacy (BTG) and Øyvinn Mølbach-Petersens Fond for Clinical Research  
569 (BTG; (Grant no. 104712, 145268, 145269 and 163424) and Bergen Research Foundation (VA).

570

571

## References

- 572 Ahmad T, Mukherjee S, Pattnaik B, Kumar M, Singh S, Kumar M, Rehman R, Tiwari BK, Jha KA,  
573 Barhanpurkar AP, Wani MR, Roy SS, Mabalirajan U, Ghosh B, Agrawal A (2014) Miro1 regulates  
574 intercellular mitochondrial transport & enhances mesenchymal stem cell rescue efficacy. *Embo J* 33: 994-  
575 1010
- 576 Andresen V, Wang X, Ghimire S, Omsland M, Gjertsen BT, Gerdes HH (2013) Tunneling nanotube  
577 (TNT) formation is independent of p53 expression. *Cell Death Differ* 20: 1124
- 578 Apperley JF (2015) Chronic myeloid leukaemia. *Lancet* 385: 1447-59
- 579 Bhatia R, McGlave PB, Dewald GW, Blazar BR, Verfaillie CM (1995) Abnormal function of the bone  
580 marrow microenvironment in chronic myelogenous leukemia: role of malignant stromal macrophages.  
581 *Blood* 85: 3636-45
- 582 Bhatia R, Verfaillie CM (1998) Inhibition of BCR-ABL expression with antisense oligodeoxynucleotides  
583 restores beta1 integrin-mediated adhesion and proliferation inhibition in chronic myelogenous leukemia  
584 hematopoietic progenitors. *Blood* 91: 3414-22
- 585 Bruserud O, Gjertsen BT, Foss B, Huang TS (2001) New strategies in the treatment of acute myelogenous  
586 leukemia (AML): in vitro culture of aml cells--the present use in experimental studies and the possible  
587 importance for future therapeutic approaches. *Stem Cells* 19: 1-11
- 588 Bruserud O, Tronstad KJ, Berge R (2005) In vitro culture of human osteosarcoma cell lines: a comparison  
589 of functional characteristics for cell lines cultured in medium without and with fetal calf serum. *J Cancer*  
590 *Res Clin Oncol* 131: 377-84
- 591 Casella JF, Flanagan MD, Lin S (1981) Cytochalasin D inhibits actin polymerization and induces  
592 depolymerization of actin filaments formed during platelet shape change. *Nature* 293: 302-5
- 593 Chauveau A, Aucher A, Eissmann P, Vivier E, Davis DM (2010) Membrane nanotubes facilitate long-  
594 distance interactions between natural killer cells and target cells. *Proc Natl Acad Sci U S A* 107: 5545-50
- 595 Chinnery HR, Pearlman E, McMenamin PG (2008) Cutting edge: Membrane nanotubes in vivo: a feature  
596 of MHC class II+ cells in the mouse cornea. *J Immunol* 180: 5779-83
- 597 Collins SJ, Gallo RC, Gallagher RE (1977) Continuous growth and differentiation of human myeloid  
598 leukaemic cells in suspension culture. *Nature* 270: 347-9
- 599 Corrado C, Raimondo S, Saieva L, Flugy AM, De Leo G, Alessandro R (2014) Exosome-mediated  
600 crosstalk between chronic myelogenous leukemia cells and human bone marrow stromal cells triggers an  
601 interleukin 8-dependent survival of leukemia cells. *Cancer Lett* 348: 71-6
- 602 Dai X, Yamasaki K, Shirakata Y, Sayama K, Hashimoto K (2004) All-trans-retinoic acid induces  
603 interleukin-8 via the nuclear factor-kappaB and p38 mitogen-activated protein kinase pathways in normal  
604 human keratinocytes. *J Invest Dermatol* 123: 1078-85
- 605 Daley GQ, Baltimore D (1988) Transformation of an interleukin 3-dependent hematopoietic cell line by  
606 the chronic myelogenous leukemia-specific P210bcr/abl protein. *Proc Natl Acad Sci U S A* 85: 9312-6

- 607 Dowding C, Gordon M, Guo AP, Maison D, Osterholz J, Siczkowski M, Goldman J (1993) Potential  
608 mechanisms of action of interferon-alpha in CML. *Leuk Lymphoma* 11 Suppl 1: 185-91
- 609 Dowding C, Guo AP, Osterholz J, Siczkowski M, Goldman J, Gordon M (1991) Interferon-alpha  
610 overrides the deficient adhesion of chronic myeloid leukemia primitive progenitor cells to bone marrow  
611 stromal cells. *Blood* 78: 499-505
- 612 Druker BJ, Tamura S, Buchdunger E, Ohno S, Segal GM, Fanning S, Zimmermann J, Lydon NB (1996)  
613 Effects of a selective inhibitor of the Abl tyrosine kinase on the growth of Bcr-Abl positive cells. *Nat Med*  
614 2: 561-6
- 615 Gordon MY, Dowding CR, Riley GP, Goldman JM, Greaves MF (1987) Altered adhesive interactions  
616 with marrow stroma of haematopoietic progenitor cells in chronic myeloid leukaemia. *Nature* 328: 342-4
- 617 Gullaksen SE, Skavland J, Gavasso S, Tosevski V, Warzocha K, Dumrese C, Ferrant A, Gedde-Dahl T,  
618 Hellmann A, Janssen J, Labar B, Lang A, Majeed W, Mihaylov G, Stentoft J, Stenke L, Thaler J, Thielen  
619 N, Verhoef G, Voglova J et al. (2017) Single cell immune profiling by mass cytometry of newly  
620 diagnosed chronic phase chronic myeloid leukemia treated with nilotinib. *Haematologica* 102: 1361-1367
- 621 Gurke S, Barroso JF, Hodneland E, Bukoreshtliev NV, Schlicker O, Gerdes HH (2008) Tunneling  
622 nanotube (TNT)-like structures facilitate a constitutive, actomyosin-dependent exchange of endocytic  
623 organelles between normal rat kidney cells. *Exp Cell Res* 314: 3669-83
- 624 Hanna SJ, McCoy-Simandle K, Miskolci V, Guo P, Cammer M, Hodgson L, Cox D (2017) The Role of  
625 Rho-GTPases and actin polymerization during Macrophage Tunneling Nanotube Biogenesis. *Sci Rep* 7:  
626 8547
- 627 Hantschel O, Gstoettenbauer A, Colinge J, Kaupé I, Bilban M, Burkard TR, Valent P, Superti-Furga G  
628 (2008) The chemokine interleukin-8 and the surface activation protein CD69 are markers for Bcr-Abl  
629 activity in chronic myeloid leukemia. *Mol Oncol* 2: 272-81
- 630 Harnois T, Constantin B, Rioux A, Grenieux E, Kitzis A, Bourmeyster N (2003) Differential interaction  
631 and activation of Rho family GTPases by p210bcr-abl and p190bcr-abl. *Oncogene* 22: 6445-54
- 632 Hase K, Kimura S, Takatsu H, Ohmae M, Kawano S, Kitamura H, Ito M, Watarai H, Hazelett CC,  
633 Yeaman C, Ohno H (2009) M-Sec promotes membrane nanotube formation by interacting with Ral and  
634 the exocyst complex. *Nat Cell Biol* 11: 1427-32
- 635 Hjorth-Hansen H, Stentoft J, Richter J, Koskenvesa P, Høglund M, Dreimane A, Porkka K, Gedde-Dahl  
636 T, Gjertsen BT, Gruber FX, Stenke L, Eriksson KM, Markevarn B, Lubking A, Vestergaard H, Udby L,  
637 Bjerrum OW, Persson I, Mustjoki S, Olsson-Stromberg U (2016) Safety and efficacy of the combination  
638 of pegylated interferon-alpha2b and dasatinib in newly diagnosed chronic-phase chronic myeloid  
639 leukemia patients. *Leukemia* 30: 1853-60
- 640 Hochhaus A, Larson RA, Guilhot F, Radich JP, Branford S, Hughes TP, Baccarani M, Deininger MW,  
641 Cervantes F, Fujihara S, Ortmann CE, Menses HD, Kantarjian H, O'Brien SG, Druker BJ, Investigators I  
642 (2017) Long-Term Outcomes of Imatinib Treatment for Chronic Myeloid Leukemia. *N Engl J Med* 376:  
643 917-927
- 644 Hurley A, Smith M, Karpova T, Hasley RB, Belkina N, Shaw S, Balenga N, Druey KM, Nickel E,  
645 Packard B, Imamichi H, Hu Z, Follmann D, McNally J, Higgins J, Sneller M, Lane HC, Catalfamo M

- 646 (2013) Enhanced effector function of CD8(+) T cells from healthy controls and HIV-infected patients  
647 occurs through thrombin activation of protease-activated receptor 1. *J Infect Dis* 207: 638-50
- 648 Joyce JA, Pollard JW (2009) Microenvironmental regulation of metastasis. *Nat Rev Cancer* 9: 239-52
- 649 Keely PJ, Westwick JK, Whitehead IP, Der CJ, Parise LV (1997) Cdc42 and Rac1 induce integrin-  
650 mediated cell motility and invasiveness through PI(3)K. *Nature* 390: 632-6
- 651 Lee JC, Hapel AJ, Ihle JN (1982) Constitutive production of a unique lymphokine (IL 3) by the WEHI-3  
652 cell line. *J Immunol* 128: 2393-8
- 653 Lou E, Fujisawa S, Morozov A, Barlas A, Romin Y, Dogan Y, Gholami S, Moreira AL, Manova-  
654 Todorova K, Moore MA (2012) Tunneling nanotubes provide a unique conduit for intercellular transfer of  
655 cellular contents in human malignant pleural mesothelioma. *PLoS One* 7: e33093
- 656 Matula Z, Nemeth A, Lorincz P, Szepesi A, Anna B, Buzas EI, Low P, Nemet K, Uher F, Urban V (2016)  
657 The role of extracellular vesicle and tunneling nanotube-mediated intercellular cross-talk between  
658 mesenchymal stem cells and human peripheral T cells. *Stem Cells Dev*
- 659 McCormack E, Haaland I, Venas G, Forthun RB, Huseby S, Gausdal G, Knappskog S, Micklem DR,  
660 Lorens JB, Bruserud O, Gjertsen BT (2012) Synergistic induction of p53 mediated apoptosis by valproic  
661 acid and nutlin-3 in acute myeloid leukemia. *Leukemia* 26: 910-7
- 662 Obr A, Roselova P, Grebenova D, Kuzelova K (2014) Real-time analysis of imatinib- and dasatinib-  
663 induced effects on chronic myelogenous leukemia cell interaction with fibronectin. *PLoS One* 9: e107367
- 664 Omsland M, Bruserud O, Gjertsen BT, Andresen V (2017) Tunneling nanotube (TNT) formation is  
665 downregulated by cytarabine and NF-kappaB inhibition in acute myeloid leukemia (AML). *Oncotarget* 8:  
666 7946-7963
- 667 Onfelt B, Nedvetzki S, Yanagi K, Davis DM (2004) Cutting edge: Membrane nanotubes connect immune  
668 cells. *J Immunol* 173: 1511-3
- 669 Osteikoetxea-Molnar A, Szabo-Meleg E, Toth EA, Oszvald A, Izsepi E, Kremlitzka M, Biri B, Nyitray L,  
670 Bozo T, Nemeth P, Kellermayer M, Nyitrai M, Matko J (2016) The growth determinants and transport  
671 properties of tunneling nanotube networks between B lymphocytes. *Cell Mol Life Sci* 73: 4531-4545
- 672 Paraguassu-Braga FH, Borojevic R, Bouzas LF, Barcinski MA, Bonomo A (2003) Bone marrow stroma  
673 inhibits proliferation and apoptosis in leukemic cells through gap junction-mediated cell communication.  
674 *Cell Death Differ* 10: 1101-8
- 675 Pasquier J, Guerrouahen BS, Al Thawadi H, Ghiabi P, Maleki M, Abu-Kaoud N, Jacob A, Mirshahi M,  
676 Galas L, Rafii S, Le Foll F, Rafii A (2013) Preferential transfer of mitochondria from endothelial to cancer  
677 cells through tunneling nanotubes modulates chemoresistance. *J Transl Med* 11: 94
- 678 Polak R, de Rooij B, Pieters R, den Boer ML (2015) B-cell precursor acute lymphoblastic leukemia cells  
679 use tunneling nanotubes to orchestrate their microenvironment. *Blood* 126: 2404-14
- 680 Rainy N, Chetrit D, Rouger V, Vernitsky H, Rechavi O, Marguet D, Goldstein I, Ehrlich M, Kloog Y  
681 (2013) H-Ras transfers from B to T cells via tunneling nanotubes. *Cell Death Dis* 4: e726

- 682 Reichert D, Scheinpflug J, Karbanova J, Freund D, Bornhauser M, Corbeil D (2016) Tunneling nanotubes  
683 mediate the transfer of stem cell marker CD133 between hematopoietic progenitor cells. *Exp Hematol*
- 684 Rustom A, Saffrich R, Markovic I, Walther P, Gerdes H-H (2004) Nanotubular highways for intercellular  
685 organelle transport. *Science* 303: 1007-10
- 686 Salgia R, Li JL, Ewaniuk DS, Pear W, Pisick E, Burky SA, Ernst T, Sattler M, Chen LB, Griffin JD  
687 (1997) BCR/ABL induces multiple abnormalities of cytoskeletal function. *J Clin Invest* 100: 46-57
- 688 Seyed-Razavi Y, Hickey MJ, Kuffova L, McMenamin PG, Chinnery HR (2013) Membrane nanotubes in  
689 myeloid cells in the adult mouse cornea represent a novel mode of immune cell interaction. *Immunol Cell*  
690 *Biol* 91: 89-95
- 691 Sham RL, Phatak PD, Belanger KA, Packman CH (1995) Functional properties of HL60 cells matured  
692 with all-trans-retinoic acid and DMSO: differences in response to interleukin-8 and fMLP. *Leuk Res* 19: 1-  
693 6
- 694 Shieh SY, Taya Y, Prives C (1999) DNA damage-inducible phosphorylation of p53 at N-terminal sites  
695 including a novel site, Ser20, requires tetramerization. *EMBO J* 18: 1815-23
- 696 Silden E, Hjelle SM, Wergeland L, Sulen A, Andresen V, Bourdon JC, Micklem DR, McCormack E,  
697 Gjertsen BT (2013) Expression of TP53 isoforms p53beta or p53gamma enhances chemosensitivity in  
698 TP53(null) cell lines. *PLoS One* 8: e56276
- 699 Simonsson B, Gedde-Dahl T, Markevarn B, Remes K, Stentoft J, Almquist A, Bjoreman M, Flogegard M,  
700 Koskenvesa P, Lindblom A, Malm C, Mustjoki S, Myhr-Eriksson K, Ohm L, Rasanen A, Sinisalo M,  
701 Sjalander A, Stromberg U, Bjerrum OW, Ehrencrona H et al. (2011) Combination of pegylated IFN-  
702 alpha2b with imatinib increases molecular response rates in patients with low- or intermediate-risk chronic  
703 myeloid leukemia. *Blood* 118: 3228-35
- 704 Sowinski S, Jolly C, Berninghausen O, Purbhoo MA, Chauveau A, Kohler K, Oddos S, Eissmann P,  
705 Brodsky FM, Hopkins C, Onfelt B, Sattentau Q, Davis DM (2008) Membrane nanotubes physically  
706 connect T cells over long distances presenting a novel route for HIV-1 transmission. *Nat Cell Biol* 10:  
707 211-9
- 708 Van Etten RA, Jackson PK, Baltimore D, Sanders MC, Matsudaira PT, Janney PA (1994) The COOH  
709 terminus of the c-Abl tyrosine kinase contains distinct F- and G-actin binding domains with bundling  
710 activity. *J Cell Biol* 124: 325-40
- 711 Verfaillie CM, McCarthy JB, McGlave PB (1992) Mechanisms underlying abnormal trafficking of  
712 malignant progenitors in chronic myelogenous leukemia. Decreased adhesion to stroma and fibronectin  
713 but increased adhesion to the basement membrane components laminin and collagen type IV. *The Journal*  
714 *of clinical investigation* 90: 1232-41
- 715 Wang X, Gerdes HH (2015) Transfer of mitochondria via tunneling nanotubes rescues apoptotic PC12  
716 cells. *Cell Death Differ* 22: 1181-91
- 717 Weisberg E, Griffin JD (2012) CML cell trafficking: Influence of the stromal microenvironment. *Open*  
718 *Journal of Hematology* 3: 1
- 719 Weisberg E, Manley PW, Breitenstein W, Bruggen J, Cowan-Jacob SW, Ray A, Huntly B, Fabbro D,  
720 Fendrich G, Hall-Meyers E, Kung AL, Mestan J, Daley GQ, Callahan L, Catley L, Cavazza C, Azam M,

721 Mohammed A, Neuberg D, Wright RD et al. (2005) Characterization of AMN107, a selective inhibitor of  
722 native and mutant Bcr-Abl. *Cancer Cell* 7: 129-41

723 Wertheim JA, Perera SA, Hammer DA, Ren R, Boettiger D, Pear WS (2003) Localization of BCR-ABL to  
724 F-actin regulates cell adhesion but does not attenuate CML development. *Blood* 102: 2220-8

725 Zaccard CR, Rinaldo CR, Mailliard RB (2016) Linked in: immunologic membrane nanotube networks. *J*  
726 *Leukoc Biol* 100: 81-94

727 Zunder ER, Finck R, Behbehani GK, Amir el AD, Krishnaswamy S, Gonzalez VD, Lorang CG, Bjornson  
728 Z, Spitzer MH, Bodenmiller B, Fantl WJ, Pe'er D, Nolan GP (2015) Palladium-based mass tag cell  
729 barcoding with a doublet-filtering scheme and single-cell deconvolution algorithm. *Nat Protoc* 10: 316-33

730

731

732

733

734

735

736

737

738

739

740

741

742

743

744

745

746

747

748



749

## Figure legends

### 750 **Fig 1: CML therapy influence TNT formation in CML cells**

751 (A) TNT quantification of bone marrow samples from 4 different CML patients, results are  
752 presented as number of TNTs/100 cells from the average of duplicates. (B) Number of TNTs  
753 were quantified in Kcl-22 (memGFP) and K562 (memGFP) cells treated with 100 U/ml of IFN $\alpha$   
754 for 24 h compared to untreated (Ctr) (C) Time-lapse of Kcl-22 cells (memGFP) treated for 1 h  
755 with IFN $\alpha$  where images were captured every 10<sup>th</sup> second for a total of 120 seconds. Arrow heads  
756 show movement of memGFP along the TNT structure over time. (D) Kcl-22 and K562  
757 (memGFP) cells were untreated (Ctr) or treated with 5  $\mu$ M imatinib (Ima) or 100 nM nilotinib  
758 (Nilo) for 24 h. (E) Kcl-22 and K562 cells were untreated (Ctr) or treated with 100 nM nilotinib  
759 (Nilo) for 1 h. (F) Scanning electron microscopy (SEM) image of a TNT connecting K562 cells  
760 treated with 5  $\mu$ M imatinib (Ima) for 24 h. Jeol JSM-7400F LEI 4.0 kV X3,700 WD 8.0 mm,  
761 scale bar =1  $\mu$ m. (G) Kcl-22 cells treated with 100 nM nilotinib 1 h, fixed with 4 % PFA and  
762 stained with phalloidin AF350 followed by anti- $\beta$ -tubulin staining. Representative images of  
763 three independent experiments are shown. Scale bars = 10  $\mu$ m. (H) Kcl-22 cells were untreated  
764 (Ctr) or treated with 100 nM nilotinib (Nilo) for 24 h and TNT quantification was performed  
765 before and after addition of CytochalasinD (CytD, 2  $\mu$ M) for 20 min, at 37°C. (I) Representative  
766 fluorescence images from three independent experiments performed in duplicate of Kcl-22  
767 (memGFP) cells with no treatment (Ctr) or treatment with nilotinib (Nilo), cytochalasin D (CytD)  
768 or nilotinib (Nilo) followed by cytochalasin D (CytD). Scale bar = 10  $\mu$ m. For all displayed  
769 graphs: Mean  $\pm$ standard deviation (SD) used together with unpaired t-tests (P\*\*<0.005,  
770 P\*\*\*<0.001, n.s= not significant). All TNT quantifications were performed at least three  
771 independent times unless otherwise noted. Fluorescence microscopy was performed by the use of



772 AxioObserver Z1 fluorescence microscope (Carl Zeiss, Inc, Thornwood, NY) with Alpha Plan  
773 Apochromat 63X/1.4 NA Oil DICIII.

774 **Fig 2: BCR-ABL1 effects of TNT formation and cell morphology in Ba/F3 cells**

775 (A) Immunoblotting of Ba/F3 BCR-ABL1 doxycycline (Dox) inducible cells. Ba/F3 cells  
776 transduced with empty vector (E.V.) and Ba/F3 transduced with BCR-ABL1 were untreated or  
777 treated with 0.1  $\mu$ M doxycycline for 24 h. Anti-cAbl antibody was used to verify BCR-ABL1  
778 expression. K562 cells were used as positive control and COXIV as loading control. (B)  
779 Fluorescence microscopy of Ba/F3 BCR-ABL1 doxycycline inducible cells cultured in the  
780 presence or absence of IL-3 and with (+Dox) or without (Ctr) 0.1 g/ml doxycycline, cells were  
781 stained with WGA488. Scale bars: = 10  $\mu$ m. (C) TNT quantification of Ba/F3 transduced with  
782 empty vector (black bars) and BCR-ABL1 doxycycline inducible Ba/F3 cells (grey bars) cultured  
783 in the presence (+) or absence (-) of IL-3 from 10 % WEHI conditioned medium and with (+) or  
784 without 0.1 g/ml doxycycline (-), 1  $\mu$ g/ml puromycin was present in the culture media in all  
785 conditions. (D) Fluorescence microscopy of Kcl-22 and K562 (memGFP) cells untreated (Ctr) or  
786 treated for 1 h with nilotinib (Nilo). Scale bar 10  $\mu$ m. (E) Mass cytometry analysis of down-  
787 stream signaling pathways of BCR-ABL1. Results are illustrated by fold changes relative to  
788 control (all gated for live cells) based on calculated Arcsinh Ratio of Medians, median from three  
789 independent experiments are shown. Microscopy was performed using AxioObserver Z1  
790 fluorescence microscope (Carl Zeiss, Inc, Thornwood, NY) with Alpha Plan Apochromat  
791 63X/1.4 NA Oil DICIII. All data are presented as mean  $\pm$ standard deviation (SD) and  
792 investigated for significance by unpaired t-tests: (P\*\*<0.005). All experiments were performed  
793 three times except TNT quantification of Ba/F3 treated with doxocycline and incubated without  
794 IL-3 (n=2).

795 **Fig 3: CML cell adherence to fibronectin enhances TNT formation and reduce cell mobility**

796 (A) Kcl-22 (memGFP) cells were pre-treated for 30 min with anti- $\beta$ 1 integrin blocking antibody  
797 (10  $\mu$ g/ml) before seeded in fibronectin-coated IBIDI wells and allowed to adhere for 3 h before  
798 treated for 1 h with nilotinib (Nilo) (1  $\mu$ M) or IFN $\alpha$  (100 U/ml). Cells were investigated by  
799 fluorescence microscopy. Scale bars = 10  $\mu$ m. (B) Cell area of experiments in (A) was measured  
800 manually using ImageJ. (C) Cells seeded on fibronectin were tracked for motility by live cell  
801 imaging and analyzed using using metamorph and measurements were calculated using  
802 Chemotaxis and Migration (IBIDI) plugin in ImageJ. (D) Statistical analysis of motility of the  
803 Kcl-22 cells following the different treatment conditions. Significant changes were calculated  
804 using unpaired Mann-Whitney test. Mean  $\pm$ standard deviation (SD) ( $P^* < 0.05$ ,  $P^{***} < 0.001$ , n.s.=  
805 not significant).

806 **Fig 4: Involvement of Rac1, Rho and Cdc42 GTPases in TNT formation**

807 (A-C) Pull-down assays of active (GTP-bound) Rac1 (A), Rho (B) and Cdc42 (C) were  
808 performed with K562 and Kcl-22 cells untreated and nilotinib (Nilo) (100 nM) treated for 1 h.  
809 Rac1 and Cdc42 were pulled-down with GST-PAK1-PBD and Rho was pulled-down with GST-  
810 Rhotekin-PBD. GTP $\gamma$ S and GDP reactions were performed on Kcl-22 or K562 cell lysates as  
811 positive and negative controls, respectively. Proteins were detected by immunoblotting using  
812 anti-Rac, anti-Rho (detecting RhoA, RhoB and RhoC) and anti-Cdc42. (D) Kcl-22 and K562  
813 cells were untreated (Ctr) or treated with imatinib (ima) (5  $\mu$ M) and nilotinib (nilo) (100 nM) for  
814 24 h before immunoblotted with a Tiam-1 antibody. Anti-GAPDH was used as loading control.  
815 Quantification of protein bands were performed using the 1D gel analysis tool at Image Quant TL  
816 (GE healthcare life sciences version 8.1). (E) TNT quantification of HL-60 and Kcl-22 cells

817 untreated (Ctr) or treated with nilotinib (Nilo) (100 nM) for 24 h. Results are presented as mean  
818  $\pm$ standard deviation (SD) and significance investigated by the use of unpaired t-tests  
819 ( $P^{***}<0.001$ , n.s= not significant).

820 **Fig 5: Nilotinib-induced TNT formation in Kcl-22 cells is negatively influenced following**  
821 **co-culture with MSCs**

822 (A) SAOS-2 cells were seeded on a fibronectin coated surface one day prior to adding the Kcl-22  
823 cells followed by nilotinib (Nilo) (100 nM) treatment or not for 24 h and TNT quantification. As  
824 a direct comparison Kcl-22 cells only were untreated or treated with nilotinib (Nilo) (100 nM) for  
825 24 h before TNTs were quantified. Results represent three independent experiments performed in  
826 duplicates. (B) Kcl-22 cells were incubated in MSC-derived conditioned medium and not treated  
827 or treated with nilotinib (Nilo) (100 nM) for 24 h TNTs were quantified and compared to Kcl-22  
828 cells incubated in regular medium, untreated (Ctr) and treated with 100 nM nilotinib (Nilo) for 24  
829 h. Results represents three independent experiments performed in duplicates. (C-D) Kcl-22 cells  
830 were incubated with CXCL8 (20 ng/ml) (C) or VEGF (20 ng/ml) (D) following no treatment or  
831 treatment with 100 nM nilotinib (Nilo) for 24 h. TNTs were quantified and compared to Kcl-22  
832 cells, untreated or treated with 100 nM nilotinib (Nilo) for 24 h. Results represent three  
833 independent experiments performed in duplicates. (E-F) ELISA for CXCL8 (pg/ml) was  
834 performed combining supernatants collected from both  $\mu$ -wells in Fig 5 A and C. Results  
835 represent two independent experiments. (G) Flow cytometric analysis of CXCR2 surface  
836 expression in Kcl-22 and K562 cells compared to unstained cells. Representative histograms of  
837 three independent experiments are shown. (H) Kcl-22 cells were incubated with CXCL8 antibody  
838 (0.2 and 0.4  $\mu$ g/ml) for 24 h followed by TNT quantification. Results represent three independent  
839 experiments. (I) Kcl-22 cells treated with different doses of reparixin (1, 10 and 100 nM) for 24h.

840 Results represent three independent experiments. Y-axis has been changed in figure H and I to  
841 better illustrate non-significant changes in TNT numbers. All results are presented as mean  
842  $\pm$ standard deviation (SD) and unpaired t-test was performed to investigate significance  
843 ( $P^{**}<0.005$ ,  $P^{***}<0.001$ , n.s= not significant).

844 **Fig 6: Kcl-22 cell differentiation increase CXCL8 secretion and inhibits the TNT-inducing**  
845 **effect by nilotinib**

846 (A) Kcl-22 cells were treated with ATRA (1  $\mu$ M) for 5 days in cell tissue flasks before seeded in  
847 IBIDI wells and treated with 100 nM nilotinib (Nilo) for 24 h. TNTs were quantified and  
848 compared to untreated cells. Results represent three independent experiments performed in  
849 duplicates. (B) ELISA of CXCL8 (pg/ml) on Kcl-22 supernatants from (A). (C) Kcl-22 cells non-  
850 treated (Ctr) and treated with ATRA were cytopun and stained with May-Grünwald Giemsa  
851 staining. (D) Quantification of differentiated cells was performed by counting at least 100 cells  
852 scoring for blast (Bl) and segmented (mature neutrophil granulocyte) (s). Scale bar = 20  $\mu$ m.  
853 Result represent three independent experiments. (E) Flow cytometry analysis of CXCR2 surface  
854 expression on Kcl-22 cells without (Ctr) and with ATRA treatment for 5 days. Results represent  
855 three independent experiments. Mean  $\pm$ standard deviation (SD) is demonstrated in the graphs.  
856 Results from unpaired t-tests ( $P^{*}<0.05$ ,  $P^{**}<0.005$ ).

857 **Fig 7: Illustrated working hypothesis of how TNT formation can be regulated in Kc-22 cells**

858 TNT induction in Kcl-22 was found to be due to increased adhesion to fibronectin coated  
859 surfaces through  $\beta$ 1-integrin. When CXCL8 was induced by release from stromal cells, adding  
860 directly CXCL8 to the cells or inducing release by ATRA treatment, the TNT induced effect by  
861 nilotinib was inhibited.

## Figure 1

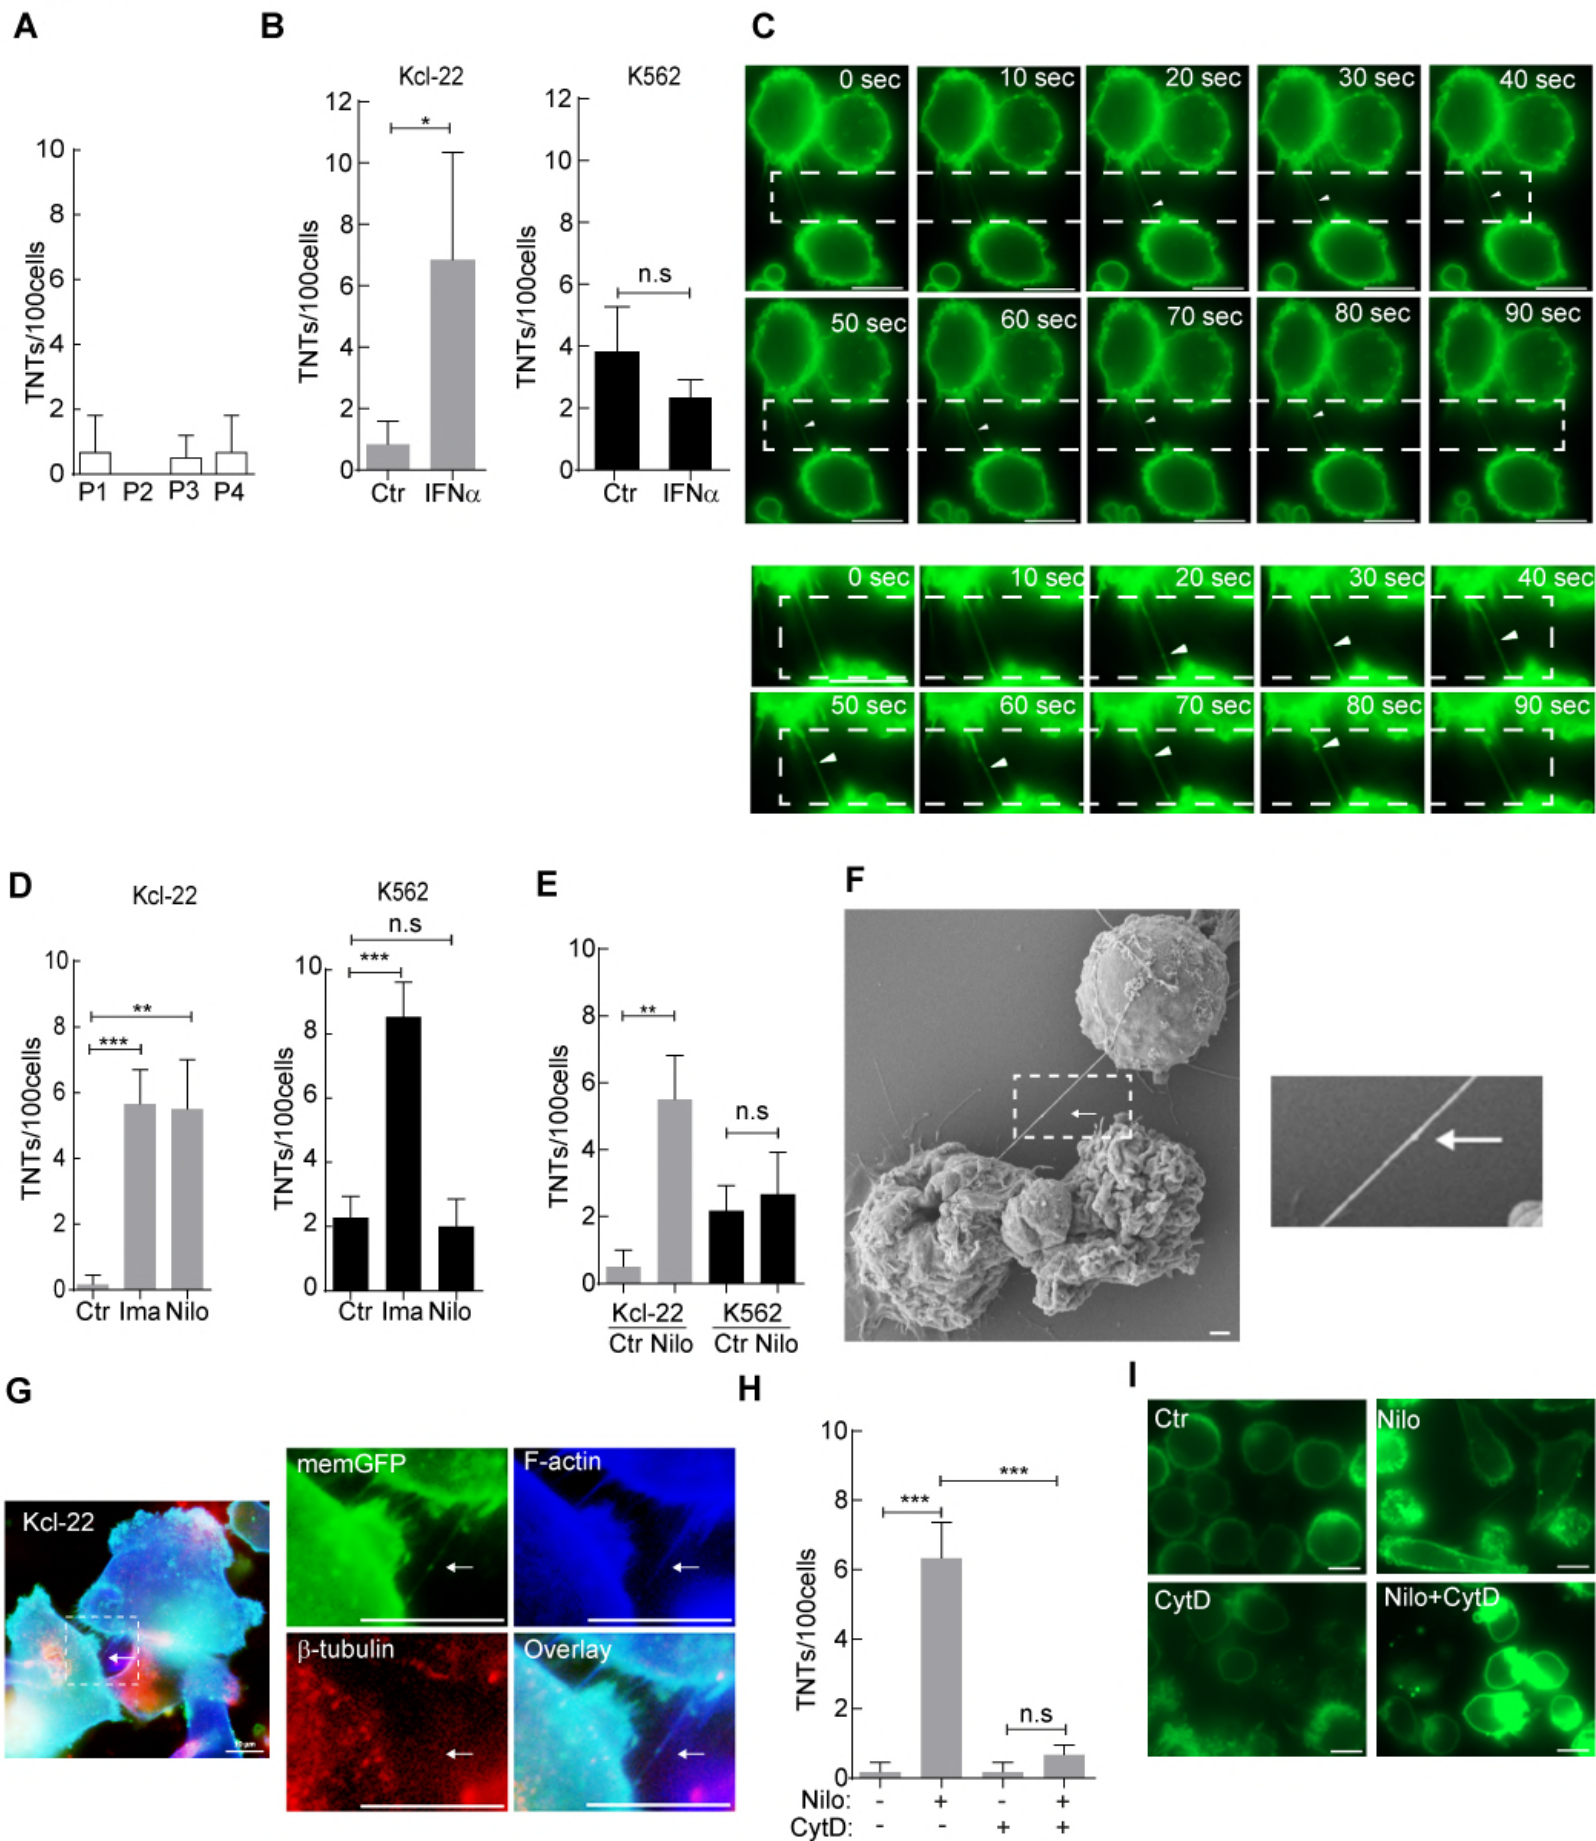



## Figure 2

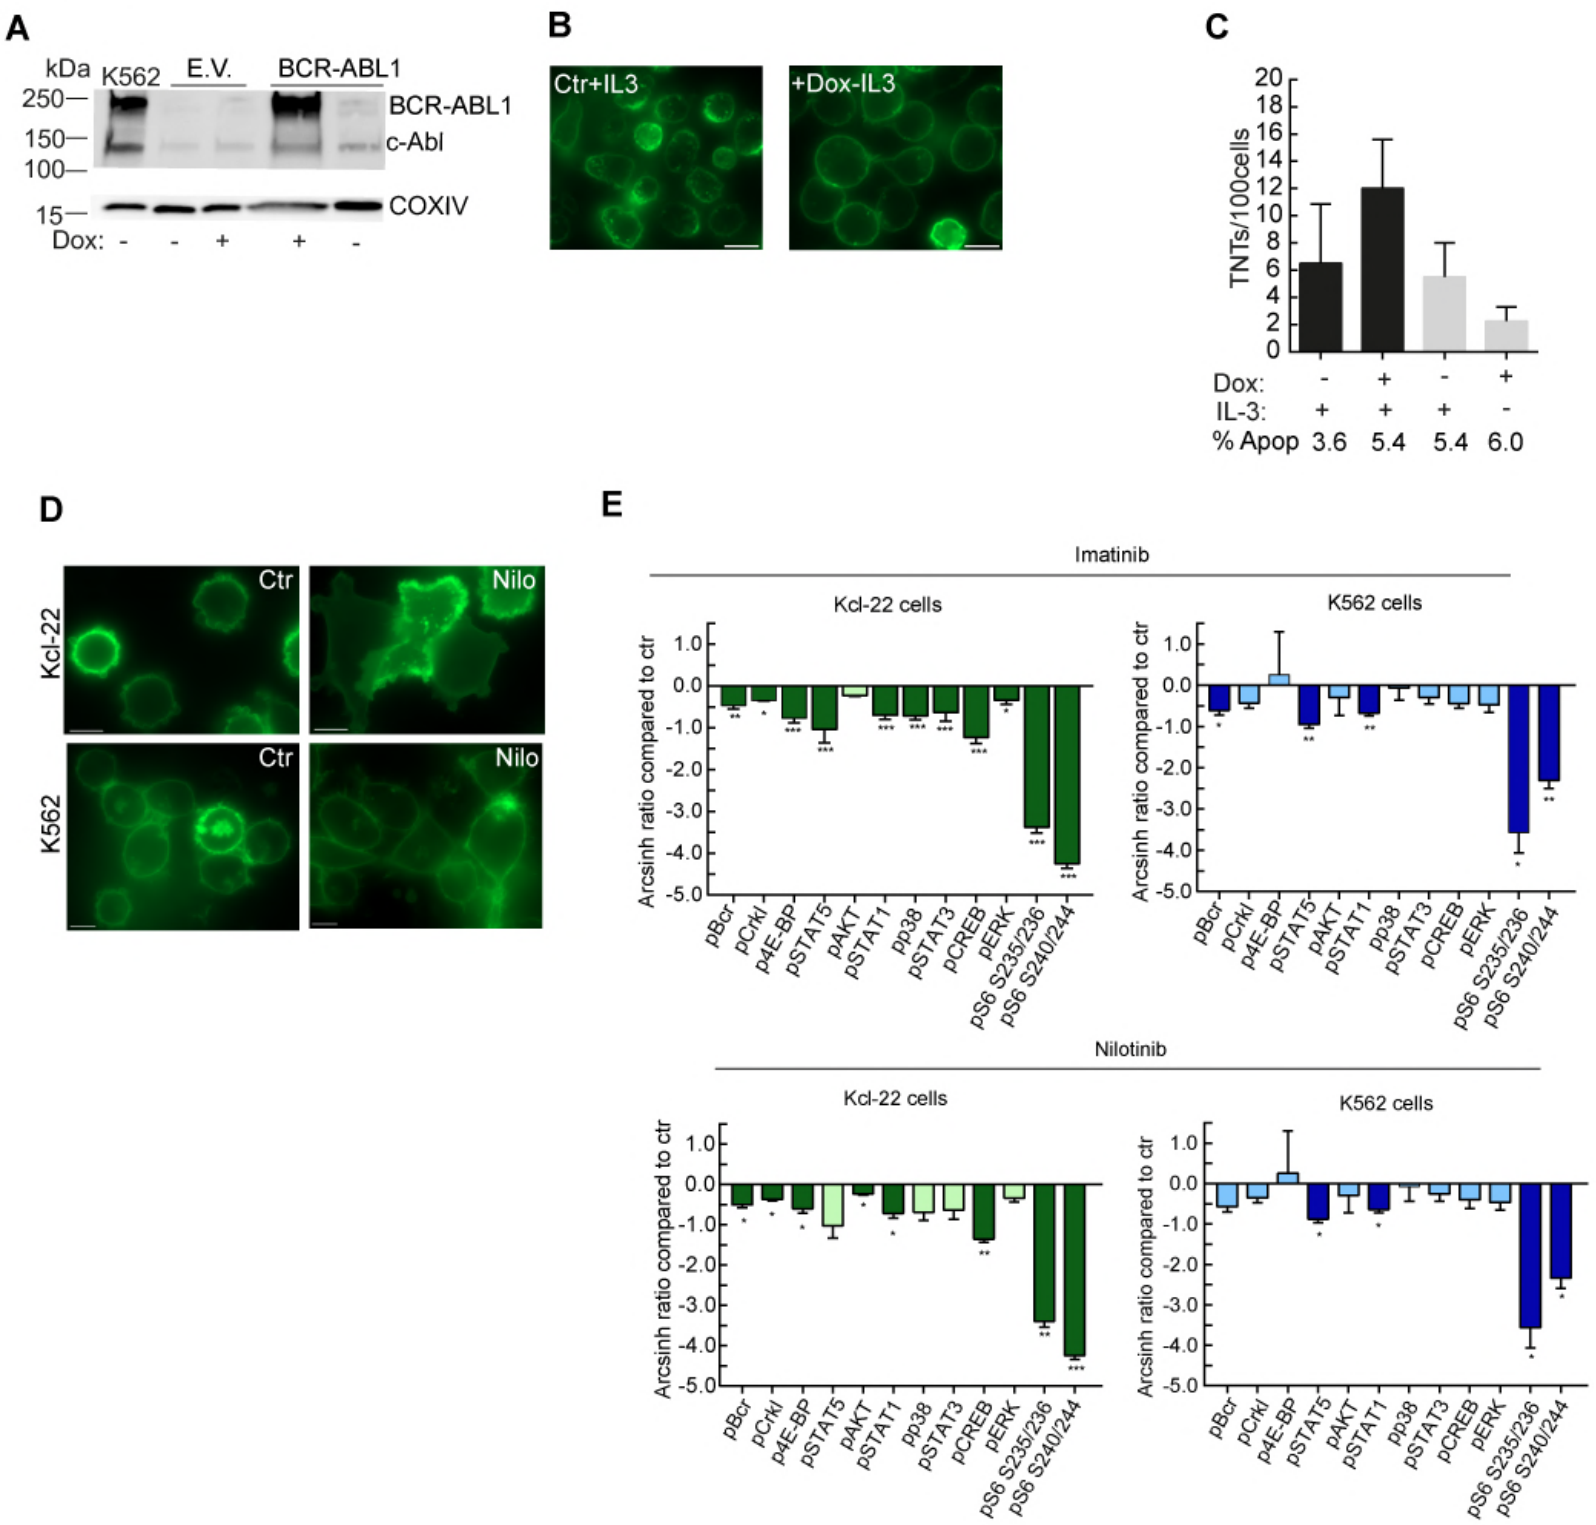

## Figure 3

**A**

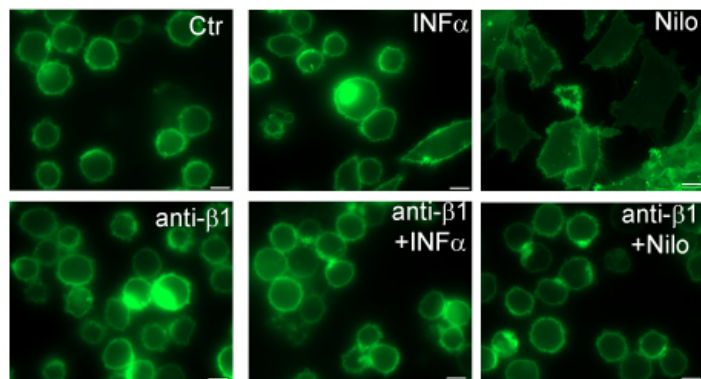

**B**

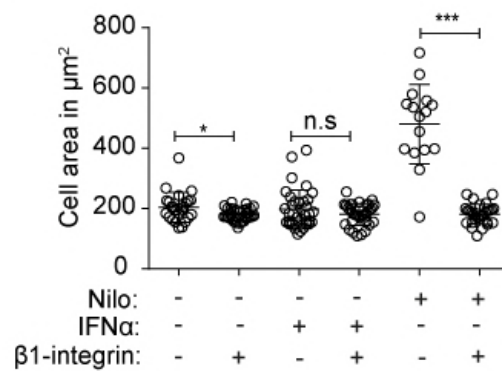

**C**

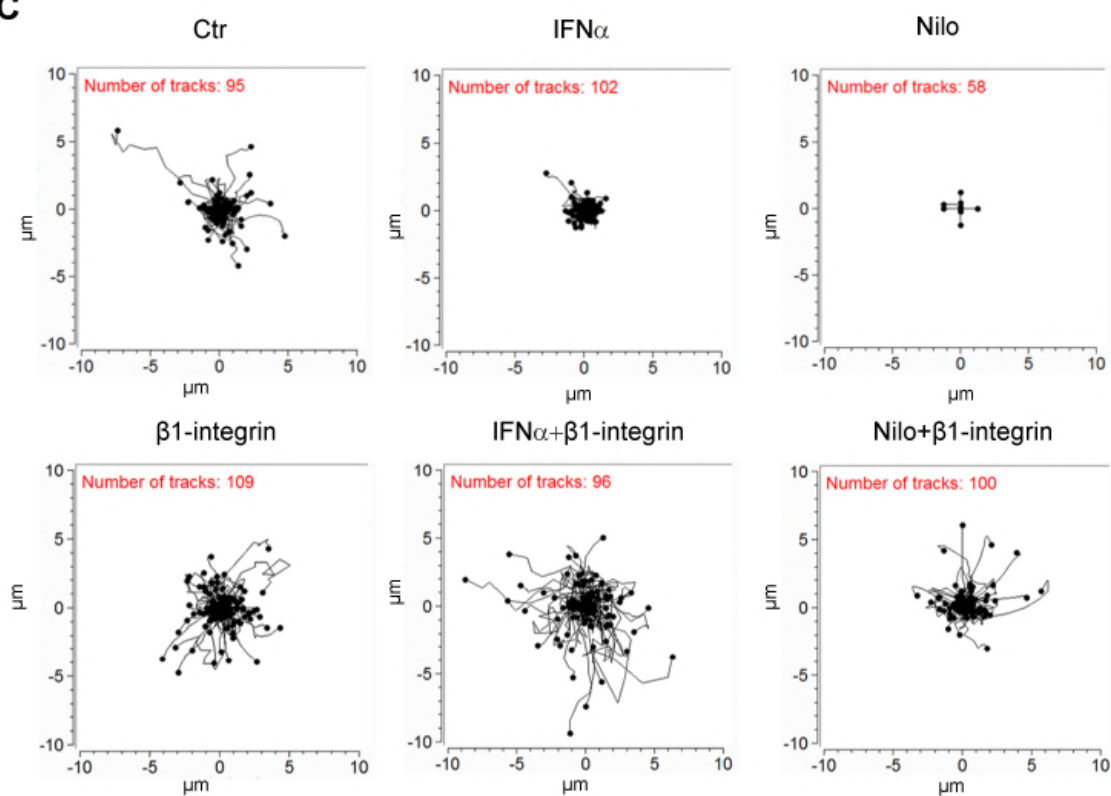

**D**

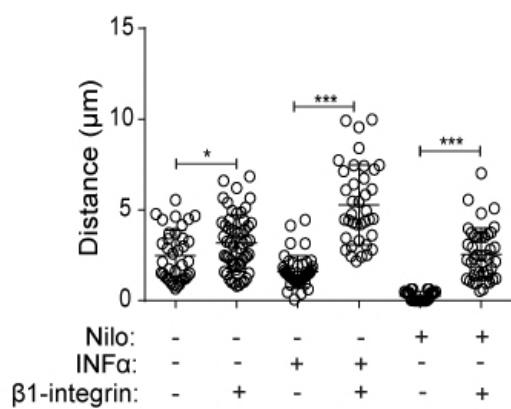

## Figure 4

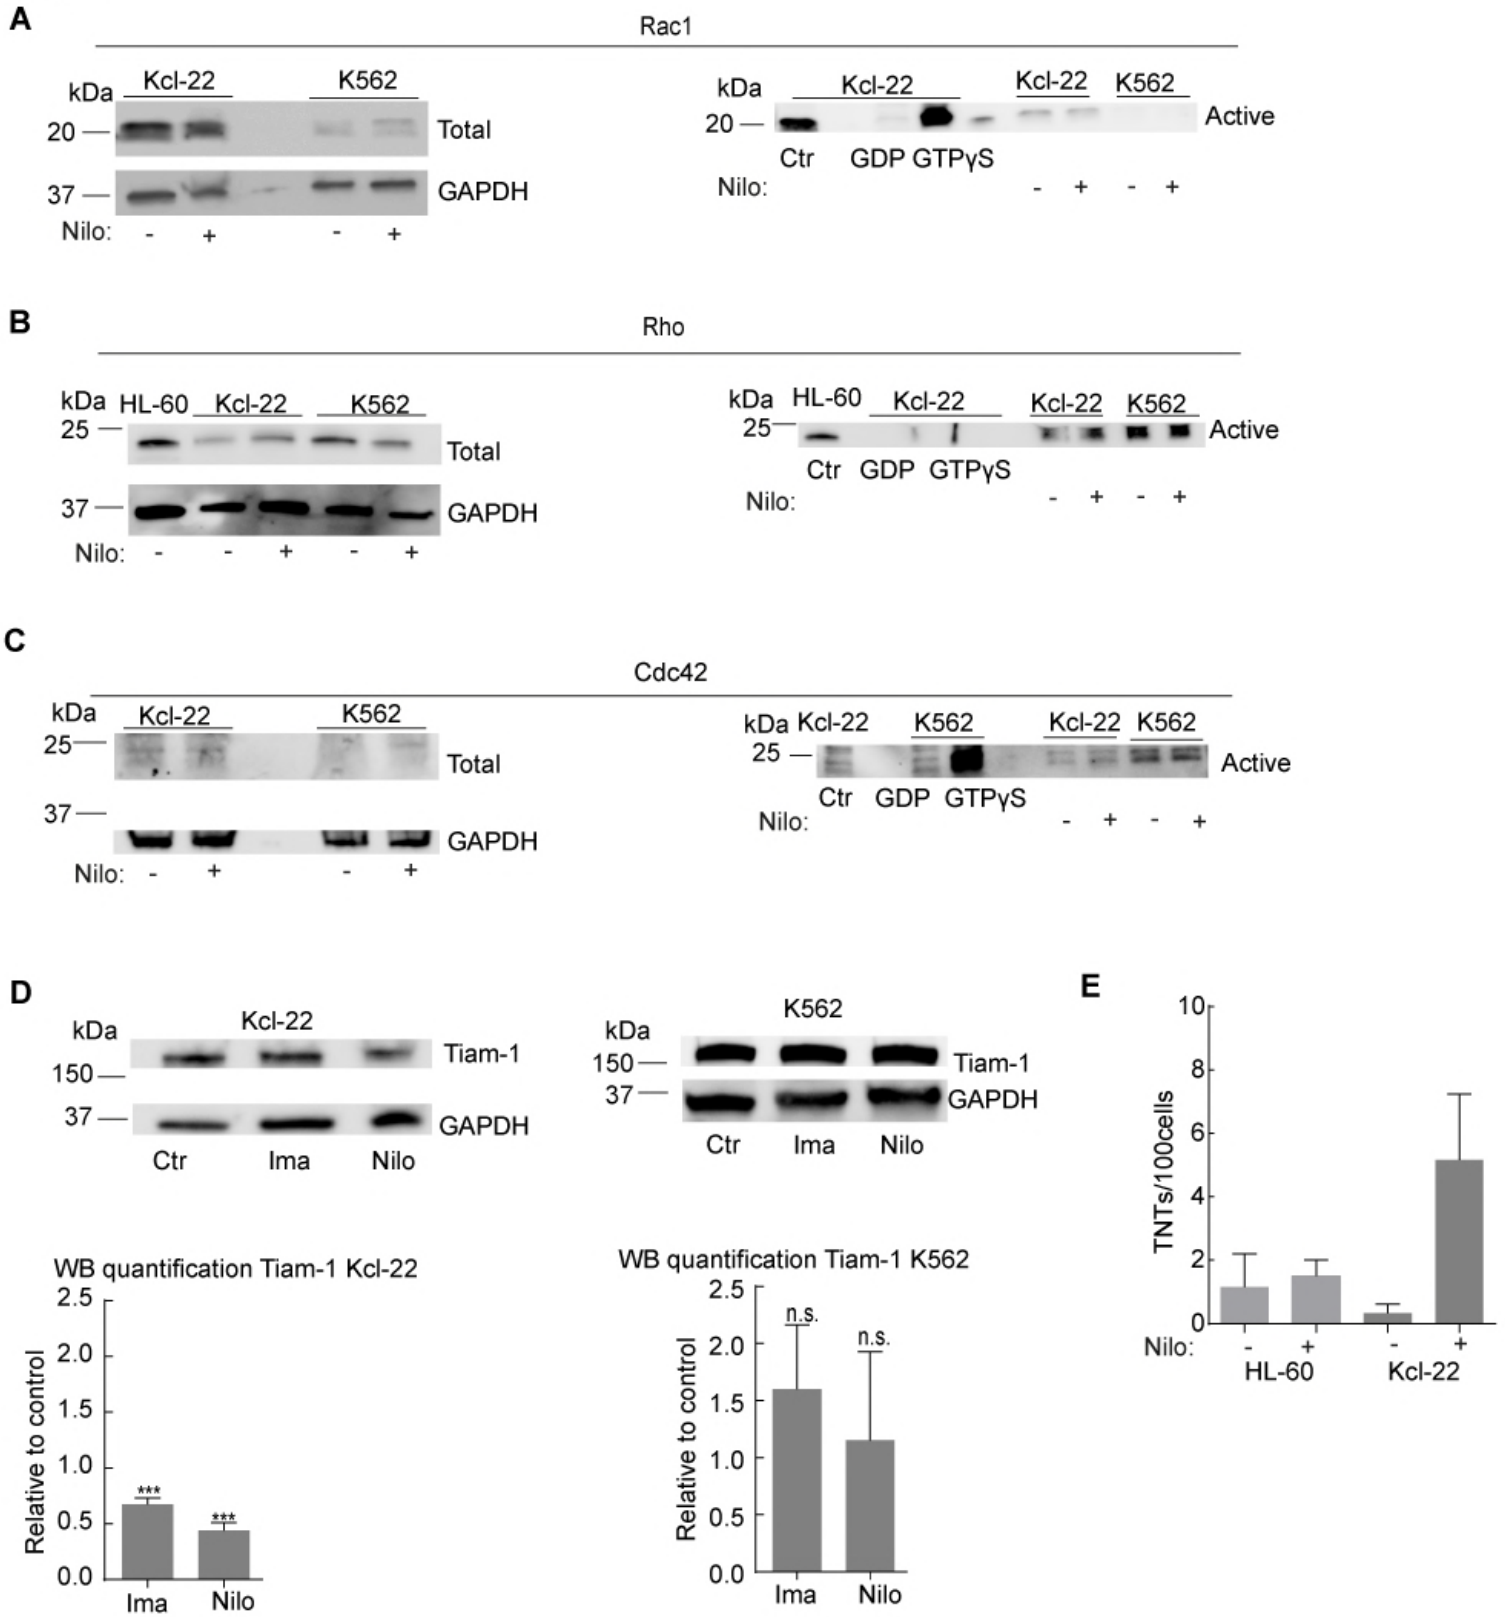



**Figure 5**

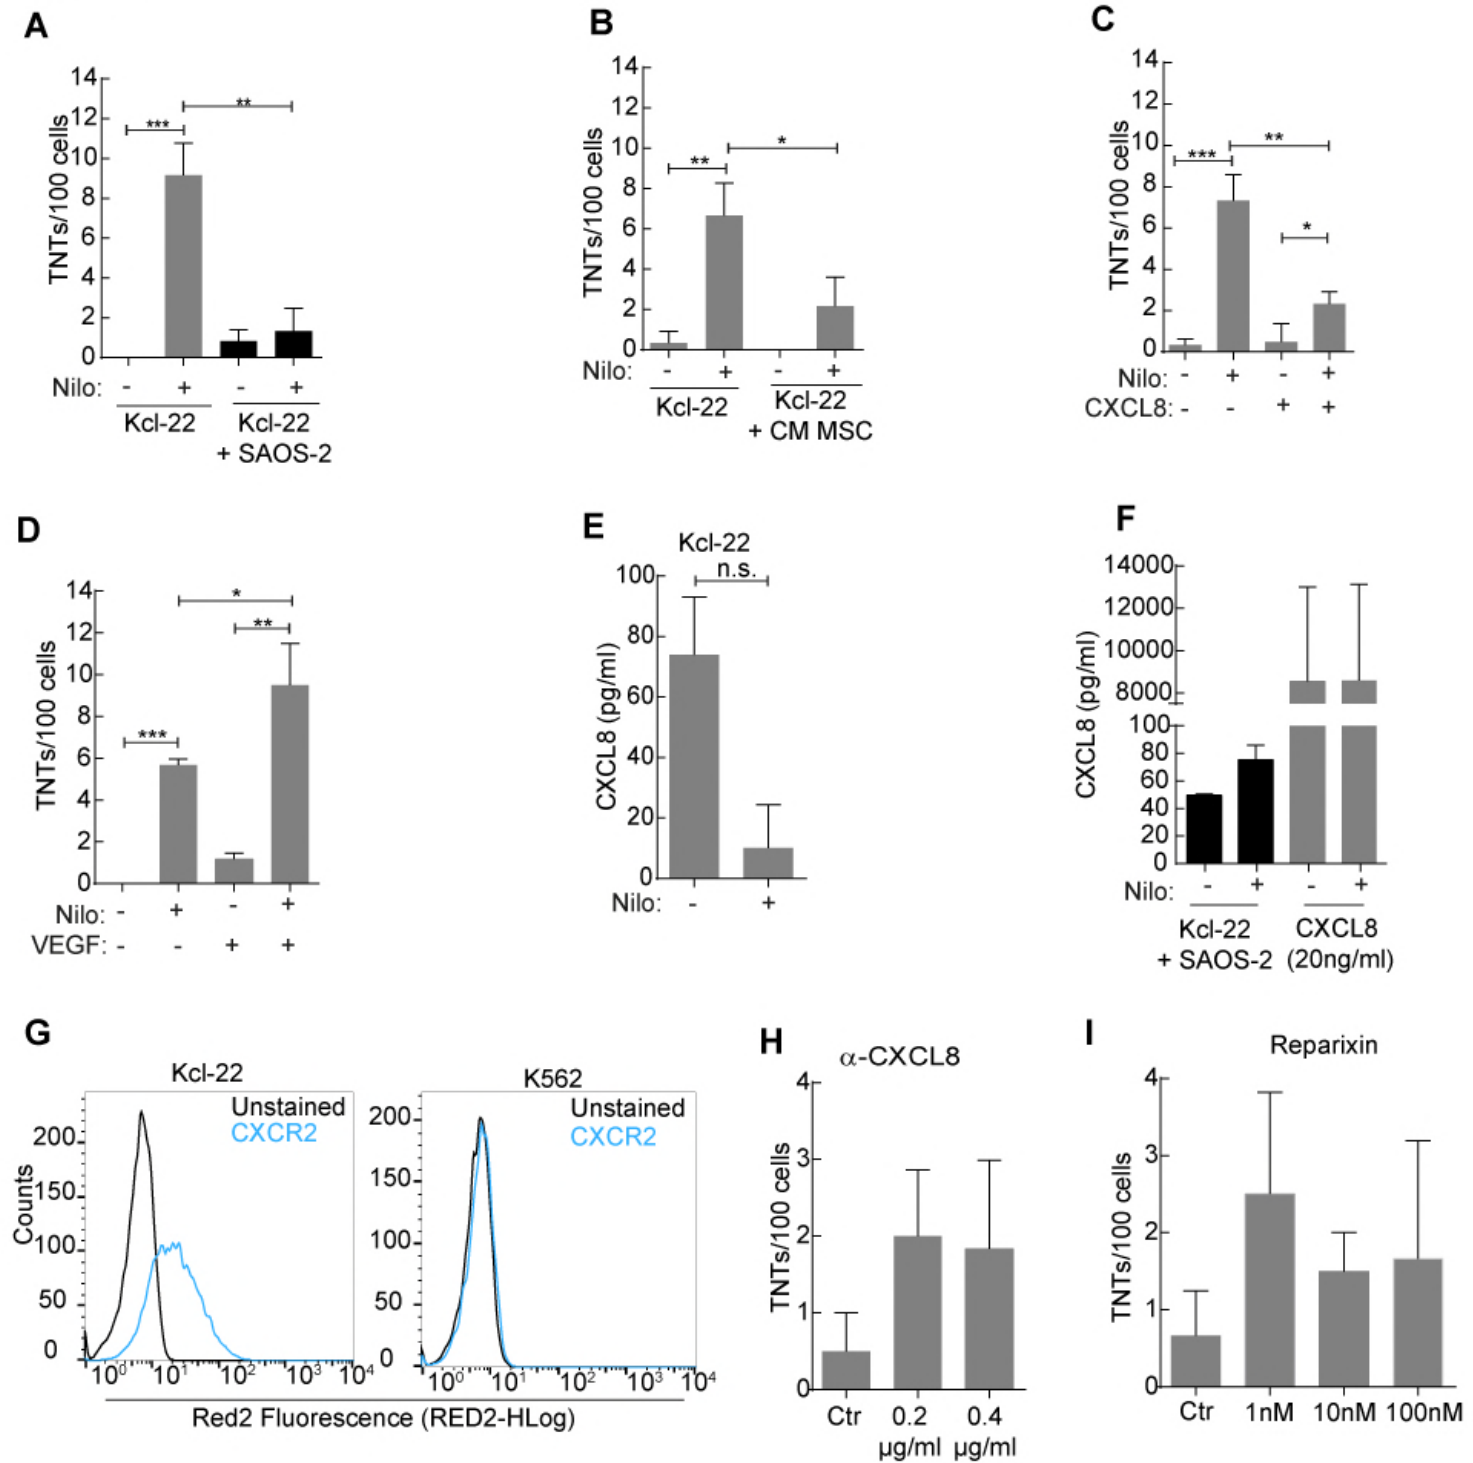

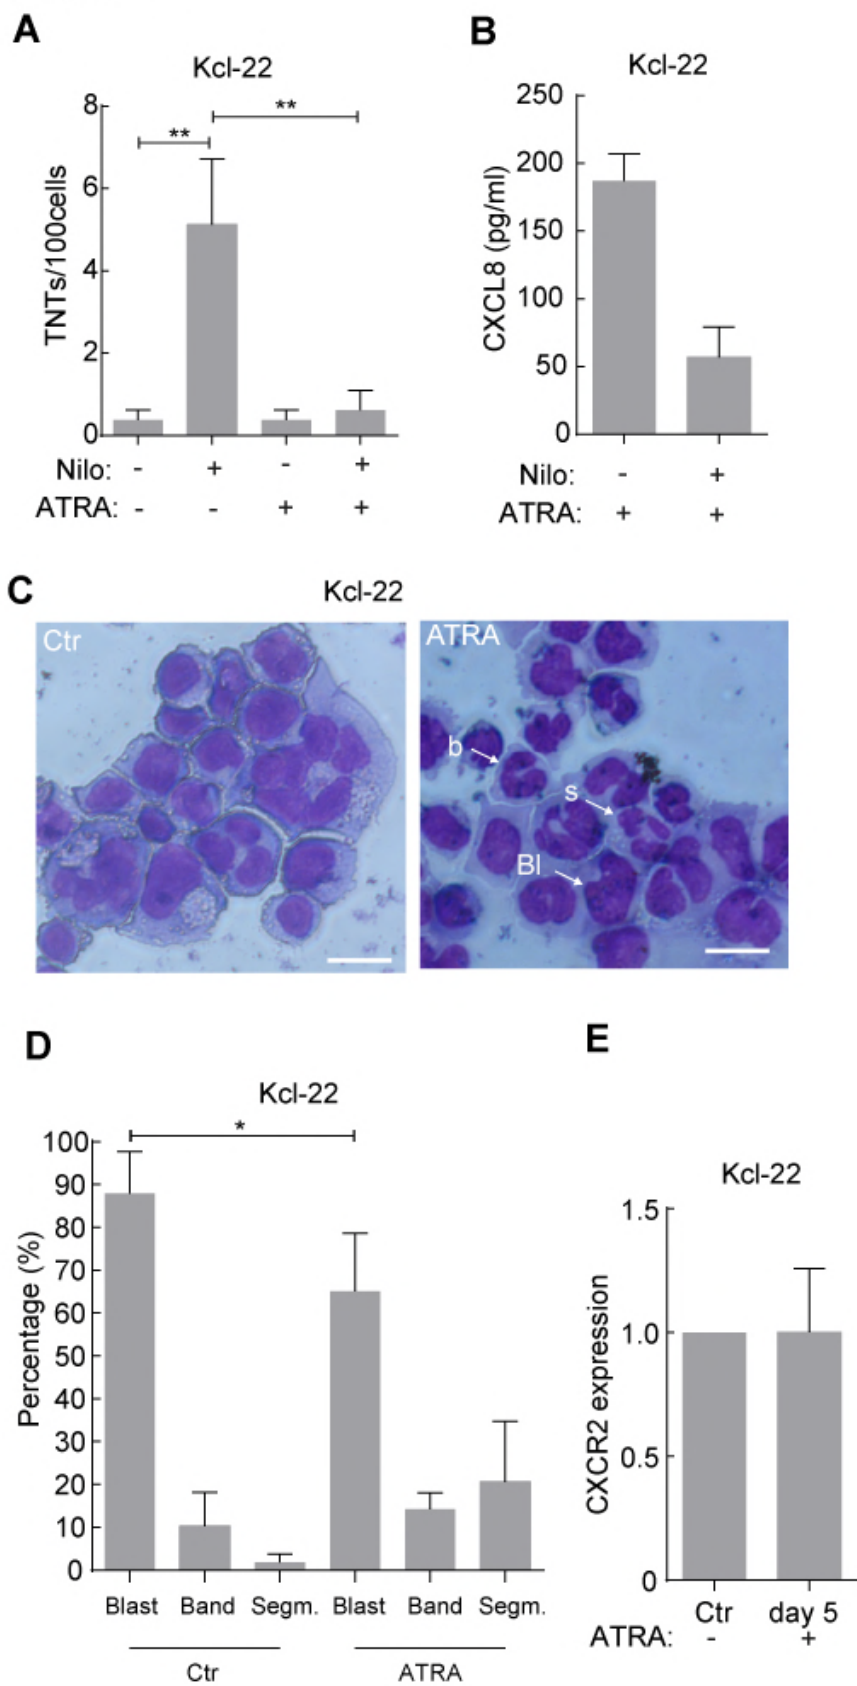

**A**

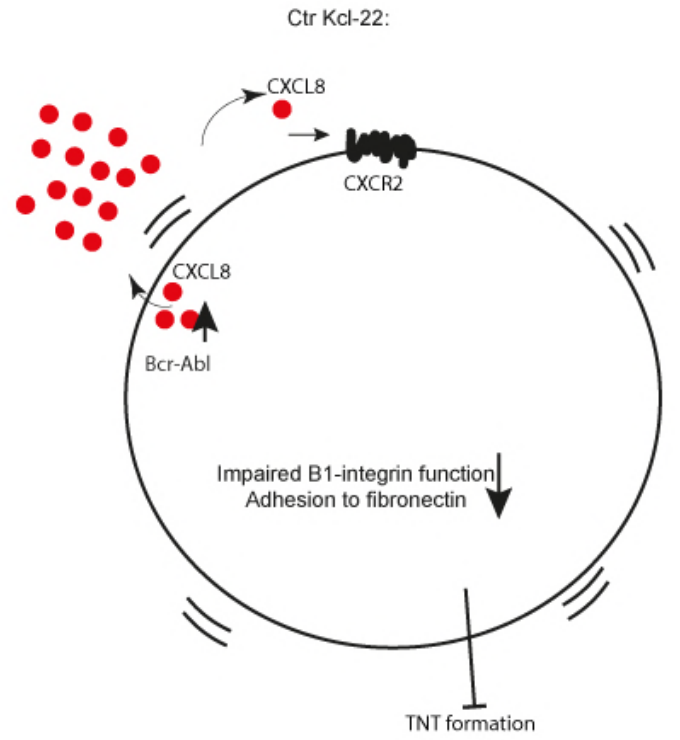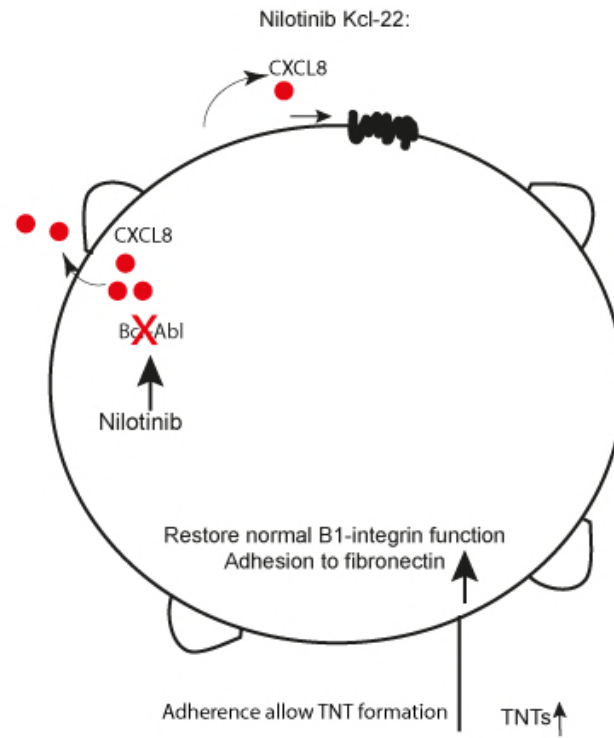

# Supplementary figure 1

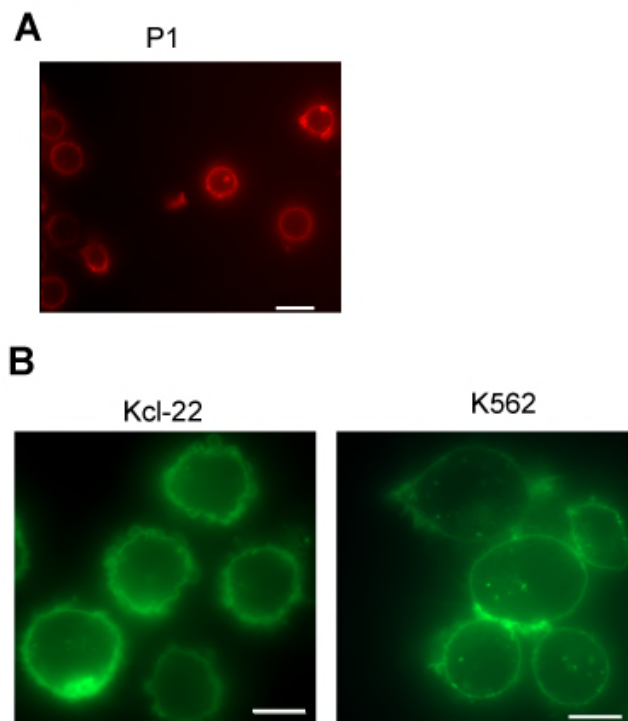

## Supplementary figure 2

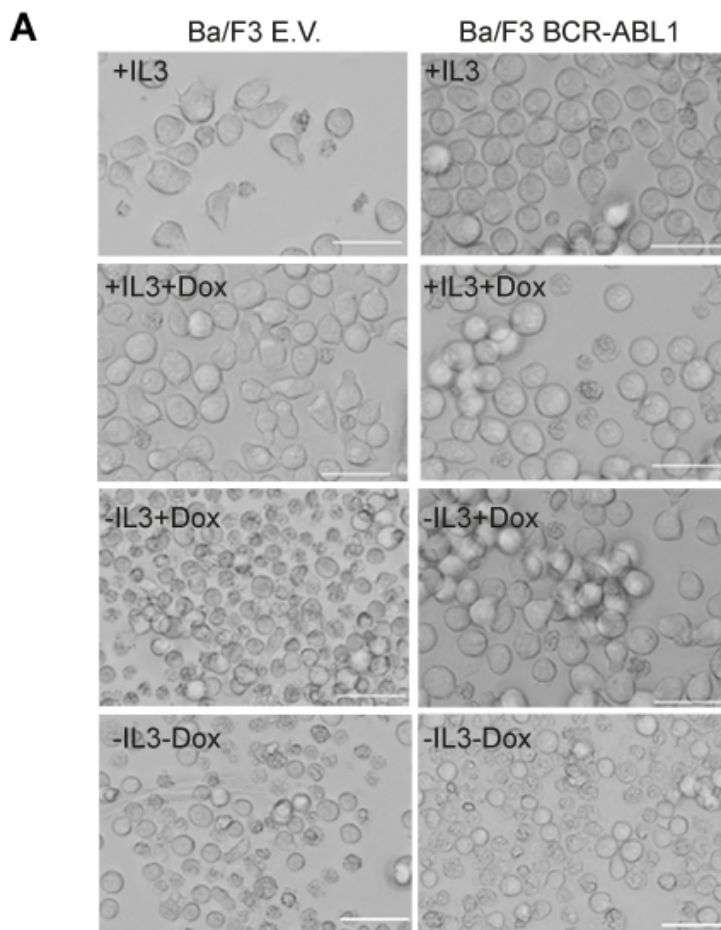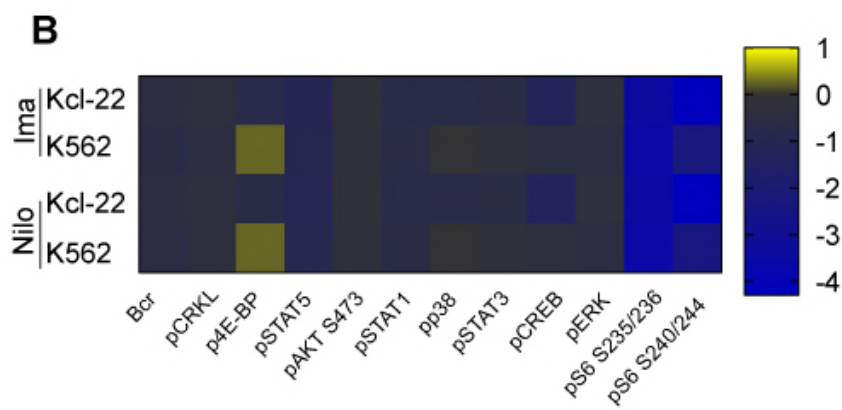

## Supplementary figure 3

**A** Kcl-22

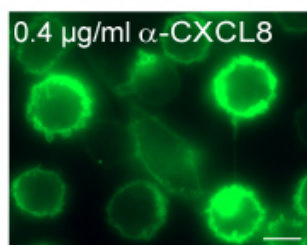

**B**

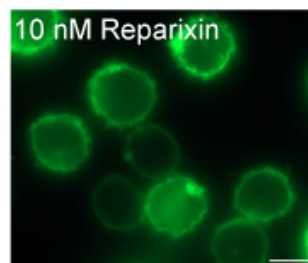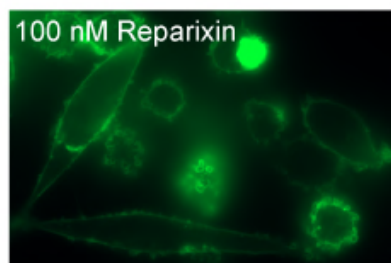

Source: https://www.biorxiv.org/content/10.1101/297838v1.full.pdf
